# Supplementary material
Source: publisher figshare collection journal article supplement (https://gsajournals.figshare.com/ndownloader/files/22686458)
Supplement: Supplementary file 1 [file 22686458]

## Sheet: Sheet1
Line	Het/Hom	Chr	position	WT	MT	Type	Gene	Mutation type	AA change
NO UVA1	het	I	44132	A	G	coding_exon	Y74C9A.1	missense	Y->C
NO UVA1	het	I	559306	T	A	intron	lpr-1
NO UVA1	het	I	1098466	T	A	intergenic
NO UVA1	het	I	1595533	T	A	intron	cpx-1
NO UVA1	het	I	1830957	A	G	intron	Y71G12B.28
NO UVA1	het	I	1930463	T	A	intron	hex-4
NO UVA1	het	I	2361551	T	A	intron	nekl-1
NO UVA1	het	I	2745647	A	T	intergenic
NO UVA1	het	I	2829957	A	T	intron	pop-1
NO UVA1	het	I	3404347	A	T	intergenic
NO UVA1	het	I	3496925	A	G	intron	Y47G6A.17
NO UVA1	het	I	4183018	T	C	coding_exon	R12E2.1	missense	M->T
NO UVA1	het	I	4249763	T	A	intron	cogc-5
NO UVA1	het	I	4645001	A	T	intron	B0041.3
NO UVA1	het	I	6385970	T	G	intergenic
NO UVA1	het	I	6713602	T	C	intergenic
NO UVA1	het	I	6743552	A	T	coding_exon	unc-37	nonsense	Y->*
NO UVA1	hom	I	7447972	T	C	intron	unc-13
NO UVA1	hom	I	7447974	T	A	intron	unc-13
NO UVA1	het	I	7741634	A	T	intergenic
NO UVA1	het	I	7767136	A	T	intron	nsf-1
NO UVA1	het	I	8150389	T	A	coding_exon	T28B8.6	missense	H->Q
NO UVA1	het	I	9045025	T	G	coding_exon	C31H5.6	missense	Y->S
NO UVA1	het	I	10031180	T	A	intron	ercc-1
NO UVA1	het	I	10353971	T	C	intergenic
NO UVA1	hom	I	10353973	T	A	intergenic
NO UVA1	het	I	10576399	G	A	intron	rtel-1
NO UVA1	het	I	10689962	T	C	intron	tag-272
NO UVA1	het	I	11109334	A	T	intron	hmr-1
NO UVA1	het	I	11676020	T	C	UTR	kpc-1
NO UVA1	het	I	11944589	T	C	intergenic
NO UVA1	het	I	12138271	T	G	intergenic
NO UVA1	het	I	12216004	A	C	intergenic
NO UVA1	het	I	12752872	T	A	intergenic
NO UVA1	het	I	13308477	T	A	coding_exon	sdz-30	missense	I->N
NO UVA1	het	I	13733099	T	C	intergenic
NO UVA1	het	I	14343591	T	C	coding_exon	Y105E8A.1	missense	Y->C
NO UVA1	het	I	14536217	T	G	intron	zoo-1
NO UVA1	het	I	14677832	T	A	coding_exon	Y105E8B.9	missense	M->L
NO UVA1	het	II	151513	T	A	intron	T25D3.4
NO UVA1	het	II	756293	T	A	UTR	C08G5.7
NO UVA1	het	II	1513625	T	A	intron	math-45
NO UVA1	het	II	1736708	T	A	intergenic
NO UVA1	het	II	2368400	T	G	coding_exon	F16G10.5	missense	V->G
NO UVA1	het	II	2581100	T	G	coding_exon	sri-74	missense	I->L
NO UVA1	het	II	3062521	T	A	intergenic
NO UVA1	het	II	3243113	T	A	intergenic
NO UVA1	het	II	3295420	TC	T	UTR	btb-17
NO UVA1	het	II	3353871	A	T	intron	bath-29
NO UVA1	het	II	3392428	T	A	coding_exon	T06D4.4	missense	K->M
NO UVA1	het	II	3898437	A	T	coding_exon	F53C3.6	missense	S->C
NO UVA1	het	II	3975123	T	A	intergenic
NO UVA1	hom	II	4490172	T	A	intergenic
NO UVA1	hom	II	4491185	T	G	UTR	camt-1
NO UVA1	het	II	4590187	G	C	coding_exon	vab-1	missense	G->A
NO UVA1	het	II	5007008	A	C	coding_exon	F59A6.4	missense	I->L
NO UVA1	het	II	5095160	A	C	intron	C04G6.13
NO UVA1	het	II	6390209	A	G	coding_exon	F58F12.3	missense	W->R
NO UVA1	het	II	6433081	T	A	intergenic
NO UVA1	het	II	6496234	A	C	intron	twk-49
NO UVA1	het	II	6542049	T	A	coding_exon	C56E6.6	missense	D->V
NO UVA1	het	II	7004074	A	T	intron	unc-104
NO UVA1	het	II	7353430	A	T	intergenic
NO UVA1	het	II	7572659	A	T	intergenic
NO UVA1	het	II	7652288	A	T	intergenic
NO UVA1	het	II	8449065	A	T	intergenic
NO UVA1	het	II	8706738	A	T	UTR	prx-5
NO UVA1	het	II	8845140	A	T	intergenic
NO UVA1	het	II	8860800	A	C	intergenic
NO UVA1	het	II	9440738	A	T	coding_exon	R09D1.2	missense	N->K
NO UVA1	het	II	9776170	A	C	intergenic
NO UVA1	het	II	9986117	A	C	intergenic
NO UVA1	het	II	10276290	A	T	intergenic
NO UVA1	het	II	10339881	A	T	coding_exon	pro-2	missense	F->I
NO UVA1	het	II	10425353	A	T	intergenic
NO UVA1	het	II	10687864	A	T	intron	ptb-1
NO UVA1	het	II	11003291	A	C	intron	ptp-3
NO UVA1	het	II	11186949	A	T	intron	sfxn-1.2
NO UVA1	het	II	11780617	A	C	intron	dna-2
NO UVA1	het	II	11844417	A	T	intron	T27D12.1
NO UVA1	het	II	11859533	A	T	intergenic
NO UVA1	het	II	12201518	A	T	intron	Y57A10A.16
NO UVA1	het	II	12626389	A	T	intergenic
NO UVA1	het	II	13563639	A	G	intron	Y48E1B.3
NO UVA1	het	II	13932339	A	C	ncRNA	W02B8.10
NO UVA1	het	II	14321815	A	G	intergenic
NO UVA1	het	II	14397987	A	C	coding_exon	nurf-1	synonymous	R->R
NO UVA1	het	II	14407914	A	T	intergenic
NO UVA1	het	II	14480698	A	C	intergenic
NO UVA1	het	II	14615749	A	G	intergenic
NO UVA1	het	II	14632888	A	T	intergenic
NO UVA1	het	II	14639188	T	G	intergenic
NO UVA1	het	II	14965060	A	T	intergenic
NO UVA1	het	II	14997406	A	T	intergenic
NO UVA1	het	III	149831	T	A	UTR	ver-2
NO UVA1	het	III	1440618	T	C	intron	Y82E9BR.2
NO UVA1	het	III	2106244	T	A	coding_exon	ppk-2	missense	I->N
NO UVA1	het	III	2288032	T	C	intron	Y54F10BM.3
NO UVA1	het	III	2575686	T	C	intergenic
NO UVA1	het	III	2790450	T	G	intron	Y71H2AM.24
NO UVA1	het	III	3093775	T	A	intron	H06I04.1
NO UVA1	het	III	3384849	T	C	intergenic
NO UVA1	het	III	4283166	T	A	intergenic
NO UVA1	het	III	4325308	T	A	coding_exon	gly-6	synonymous	L->L
NO UVA1	het	III	4595292	C	A	coding_exon	asb-1	missense	E->D
NO UVA1	het	III	4713178	T	G	intron	him-18
NO UVA1	het	III	5183542	T	A	intergenic
NO UVA1	het	III	5229856	T	A	coding_exon	atp-2	missense	I->N
NO UVA1	het	III	5652208	T	G	coding_exon	ckk-1	missense	C->G
NO UVA1	het	III	5767596	T	A	intergenic
NO UVA1	het	III	5879772	T	A	intron	hpo-10
NO UVA1	het	III	6098411	T	G	intron	C05D10.4
NO UVA1	het	III	6244011	T	A	intron	T12A2.6
NO UVA1	het	III	7795815	T	A	intergenic
NO UVA1	het	III	7945369	T	G	UTR	kle-2
NO UVA1	het	III	8168597	T	A	coding_exon	prp-8	missense	W->R
NO UVA1	het	III	8197460	T	A	intron	unc-36
NO UVA1	het	III	8293850	T	C	intron	mig-10
NO UVA1	het	III	8293905	T	C	intron	mig-10
NO UVA1	het	III	8293915	T	C	intron	mig-10
NO UVA1	hom	III	9381696	T	G	intergenic
NO UVA1	het	III	10045678	T	G	coding_exon	T16G12.1	missense	D->A
NO UVA1	het	III	10204293	T	A	coding_exon	chc-1	nonsense	Y->*
NO UVA1	het	III	10477337	T	A	intron	D2045.9
NO UVA1	het	III	10522794	T	A	coding_exon	unc-49	missense	D->E
NO UVA1	het	III	10570519	T	A	coding_exon	acdh-11	missense	D->E
NO UVA1	het	III	10662549	T	A	intron	cnt-2
NO UVA1	het	III	10774900	T	A	intron	dpy-28
NO UVA1	het	III	11152590	T	A	coding_exon	Y47D3A.29	missense	C->S
NO UVA1	het	III	11662706	T	A	intron	crh-1
NO UVA1	het	III	11796470	A	C	coding_exon	twk-39	missense	I->L
NO UVA1	het	III	12463468	T	G	intron	Y49E10.21
NO UVA1	het	III	12481598	T	C	intron	cccp-1
NO UVA1	het	III	12507692	T	G	intron	Y111B2A.4
NO UVA1	het	IV	53545	A	T	intergenic
NO UVA1	het	IV	1122827	A	T	intron	perm-4
NO UVA1	het	IV	1363276	A	C	intergenic
NO UVA1	het	IV	1819863	A	G	intron	col-109
NO UVA1	het	IV	1869477	T	A	intron	pkg-1
NO UVA1	het	IV	2339905	A	T	coding_exon	ppgn-1	missense	M->K
NO UVA1	het	IV	2388181	A	C	intergenic
NO UVA1	het	IV	2583670	A	C	intergenic
NO UVA1	het	IV	2800811	A	T	intron	Y54G2A.10
NO UVA1	het	IV	3445896	T	G	intron	F58E2.5
NO UVA1	het	IV	3958276	A	T	intron	clec-74
NO UVA1	het	IV	4233257	A	T	intergenic
NO UVA1	het	IV	4330603	A	T	intron	W03B1.2
NO UVA1	het	IV	4444029	A	G	coding_exon	wapl-1	missense	S->P
NO UVA1	het	IV	4509568	T	A	intron	ZK180.3
NO UVA1	het	IV	4526393	A	C	intergenic
NO UVA1	het	IV	4538628	A	G	intron	ZK185.2
NO UVA1	het	IV	4604207	A	C	intron	F19C7.4
NO UVA1	het	IV	5210353	A	G	coding_exon	nbet-1	missense	Y->C
NO UVA1	het	IV	5289109	A	T	intergenic
NO UVA1	het	IV	5421608	A	T	intergenic
NO UVA1	het	IV	5606802	A	T	intron	fkh-7
NO UVA1	het	IV	5763097	A	T	intergenic
NO UVA1	het	IV	6020568	A	T	intron	pqn-22
NO UVA1	het	IV	6198123	A	G	intergenic
NO UVA1	het	IV	6223773	A	C	coding_exon	C49A9.3	missense	E->D
NO UVA1	het	IV	6238988	A	T	coding_exon	F58F9.8	missense	N->Y
NO UVA1	het	IV	6730163	T	G	intergenic
NO UVA1	het	IV	7257649	A	G	intron	C06E4.6
NO UVA1	het	IV	7280986	A	G	intron	C06E4.2
NO UVA1	het	IV	7538999	A	T	intron	R05G6.1
NO UVA1	het	IV	7872453	A	T	intron	T06C10.3
NO UVA1	hom	IV	7885579	G	A	intron	C55F2.1
NO UVA1	het	IV	8957960	A	T	coding_exon	tpra-1	missense	N->I
NO UVA1	het	IV	9623469	A	C	intergenic
NO UVA1	het	IV	9793868	A	T	intron	pis-1
NO UVA1	het	IV	9793869	T	G	intron	pis-1
NO UVA1	het	IV	10336921	A	C	intron	unc-43
NO UVA1	het	IV	10784802	A	T	intergenic
NO UVA1	het	IV	11317565	A	T	intron	gspd-1
NO UVA1	het	IV	11449227	A	C	intergenic
NO UVA1	het	IV	12142719	T	C	coding_exon	B0001.5	missense	N->S
NO UVA1	het	IV	12673499	A	C	coding_exon	C26H9A.2	missense	K->T
NO UVA1	het	IV	13261713	A	C	UTR	unc-26
NO UVA1	het	IV	13440682	T	G	intron	mam-3
NO UVA1	het	IV	13867444	A	C	intergenic
NO UVA1	het	IV	14163134	A	T	intergenic
NO UVA1	het	IV	14325310	A	T	intron	fbxa-83
NO UVA1	het	IV	14993340	A	C	intron	Y41E3.3
NO UVA1	het	IV	15295165	A	G	intron	Y73F8A.10
NO UVA1	het	IV	15839473	T	A	intergenic
NO UVA1	het	IV	15842226	A	C	intergenic
NO UVA1	het	IV	15902113	A	C	intergenic
NO UVA1	het	IV	15983596	A	T	coding_exon	Y105C5B.19	missense	D->E
NO UVA1	het	IV	16290345	A	T	intergenic
NO UVA1	het	IV	16300903	A	T	intergenic
NO UVA1	het	IV	16689167	A	G	intergenic
NO UVA1	het	IV	17018152	G	T	intergenic
NO UVA1	hom	IV	17193387	A	T	intergenic
NO UVA1	hom	IV	17193388	T	G	intergenic
NO UVA1	het	IV	17201768	A	T	coding_exon	C52D10.12	missense	N->K
NO UVA1	het	IV	17321025	A	T	intron	C49C3.4
NO UVA1	hom	IV	17344251	C	A	coding_exon	C49C3.11	missense	A->E
NO UVA1	het	V	234794	A	T	intergenic
NO UVA1	het	V	497032	A	G	coding_exon	nhr-131	missense	I->V
NO UVA1	het	V	497035	C	A	coding_exon	nhr-131	missense	Q->K
NO UVA1	het	V	996366	A	T	intergenic
NO UVA1	het	V	1795084	A	G	intron	F36H9.1
NO UVA1	het	V	2089003	A	T	intron	F36F12.4
NO UVA1	het	V	2866661	A	C	coding_exon	srh-240	missense	D->A
NO UVA1	het	V	2885094	A	T	coding_exon	sre-24	missense	E->D
NO UVA1	het	V	2973117	A	T	coding_exon	srw-129	missense	M->L
NO UVA1	het	V	3082424	A	G	coding_exon	srt-7	missense	D->G
NO UVA1	het	V	3559856	G	T	intergenic
NO UVA1	het	V	3686708	A	T	intergenic
NO UVA1	het	V	3701779	A	C	intergenic
NO UVA1	het	V	3822364	T	C	intergenic
NO UVA1	het	V	3859482	A	T	intron	nhr-189
NO UVA1	het	V	3859483	T	A	intron	nhr-189
NO UVA1	het	V	4041474	A	T	coding_exon	C49G7.6	missense	I->L
NO UVA1	het	V	4351312	A	T	coding_exon	F32D1.3	nonsense	L->*
NO UVA1	hom	V	4675628	A	T	UTR	K03B4.6
NO UVA1	het	V	5018795	T	A	intergenic
NO UVA1	het	V	5828524	A	T	coding_exon	let-418	missense	Y->F
NO UVA1	het	V	6664151	A	T	coding_exon	pmp-5	missense	M->K
NO UVA1	het	V	6698048	A	T	intergenic
NO UVA1	het	V	6894853	A	C	intergenic
NO UVA1	het	V	7131648	C	A	intergenic
NO UVA1	het	V	7184581	A	T	intergenic
NO UVA1	het	V	7553735	A	G	UTR	ttr-10
NO UVA1	het	V	7722443	A	T	intron	ZK105.6
NO UVA1	het	V	7791889	A	C	intergenic
NO UVA1	het	V	7961564	A	T	coding_exon	inx-4	missense	M->K
NO UVA1	het	V	8678714	A	T	intergenic
NO UVA1	het	V	9111912	A	T	intergenic
NO UVA1	het	V	9535326	A	T	intron	tag-329
NO UVA1	het	V	9558223	A	G	coding_exon	rgef-1	synonymous	H->H
NO UVA1	het	V	9844691	A	T	intron	sru-8
NO UVA1	het	V	10699623	A	G	intergenic
NO UVA1	het	V	10837906	A	T	intron	nrx-1
NO UVA1	het	V	10928276	A	T	intergenic
NO UVA1	het	V	11215476	A	T	intron	K10D6.4
NO UVA1	het	V	11603166	A	G	coding_exon	dhs-20	missense	Y->H
NO UVA1	het	V	11707603	A	T	intergenic
NO UVA1	het	V	11723972	A	T	intron	daf-11
NO UVA1	het	V	11723973	T	A	intron	daf-11
NO UVA1	het	V	11770092	A	T	miRNA	mir-61
NO UVA1	het	V	11783759	A	C	coding_exon	F55A11.11	missense	I->L
NO UVA1	het	V	12137042	A	T	coding_exon	C27A7.1	missense	I->F
NO UVA1	het	V	12300142	A	G	intergenic
NO UVA1	het	V	12695390	A	T	intergenic
NO UVA1	het	V	13393820	A	C	intergenic
NO UVA1	het	V	13731600	A	T	intergenic
NO UVA1	het	V	13767134	A	C	coding_exon	F20G2.3	missense	F->V
NO UVA1	het	V	14256521	A	T	intergenic
NO UVA1	het	V	14485897	A	T	intergenic
NO UVA1	het	V	14510875	T	C	intron	R02D5.9
NO UVA1	het	V	14657700	A	G	intron	C54G10.4
NO UVA1	het	V	14925709	T	C	intergenic
NO UVA1	het	V	15008929	A	T	coding_exon	nmr-2	missense	I->K
NO UVA1	het	V	15345495	A	C	intergenic
NO UVA1	het	V	15350978	A	T	intergenic
NO UVA1	het	V	15358333	A	T	intron	ech-1
NO UVA1	hom	V	15762551	T	A	intron	haf-3
NO UVA1	het	V	15811327	A	G	coding_exon	F54B8.1	synonymous	L->L
NO UVA1	het	V	15884508	A	G	coding_exon	oac-42	synonymous	L->L
NO UVA1	het	V	15884860	A	G	intergenic
NO UVA1	het	V	15911100	A	T	intergenic
NO UVA1	het	V	15937124	TAAAAA	TAAAA	intergenic
NO UVA1	het	V	15957762	A	G	coding_exon	F36G9.3	missense	Y->C
NO UVA1	het	V	16317029	A	T	coding_exon	str-214	missense	I->F
NO UVA1	het	V	17243101	A	T	intergenic
NO UVA1	het	V	17685377	A	C	coding_exon	F59A1.6	missense	Y->S
NO UVA1	het	V	17889862	A	T	intergenic
NO UVA1	het	V	18103111	A	T	coding_exon	par-4	missense	M->L
NO UVA1	het	V	18762733	A	T	intron	F11D11.4
NO UVA1	het	V	19097420	A	C	intergenic
NO UVA1	het	V	19858511	A	T	intron	Y116F11B.8
NO UVA1	het	V	19873955	A	C	intergenic
NO UVA1	het	V	20040291	A	T	intergenic
NO UVA1	het	V	20154145	A	C	intron	F19B2.7
NO UVA1	het	V	20167636	CA	C	intergenic
NO UVA1	het	X	272588	T	G	intron	Y108F1.5
NO UVA1	het	X	716511	T	C	intergenic
NO UVA1	het	X	1418652	GTTTTT	GTTTT	UTR	F19G12.8
NO UVA1	het	X	1483653	C	G	intron	D1005.1
NO UVA1	het	X	1775902	C	A	intergenic
NO UVA1	het	X	2653629	A	T	intron	F54G2.1
NO UVA1	het	X	2653809	A	C	intron	F54G2.1
NO UVA1	het	X	2991124	A	T	intron	osm-5
NO UVA1	het	X	3134683	A	T	intergenic
NO UVA1	het	X	3632935	A	T	intron	gst-11
NO UVA1	het	X	3635845	A	C	intergenic
NO UVA1	het	X	3646489	A	C	UTR	sax-1
NO UVA1	het	X	3889411	A	T	intron	F47F2.1
NO UVA1	het	X	4305264	A	T	coding_exon	pqn-15	missense	M->K
NO UVA1	het	X	4780971	A	T	intron	F43C9.3
NO UVA1	het	X	4910364	A	G	intron	K05B2.2
NO UVA1	het	X	5097574	A	T	ncRNA	C42D8.11
NO UVA1	het	X	5133241	A	T	intergenic
NO UVA1	het	X	5133246	C	A	intergenic
NO UVA1	het	X	5133248	C	A	intergenic
NO UVA1	het	X	5133249	C	A	intergenic
NO UVA1	het	X	5133252	A	T	intergenic
NO UVA1	het	X	5474381	A	G	intergenic
NO UVA1	het	X	5508577	A	G	intergenic
NO UVA1	het	X	5613525	A	T	intergenic
NO UVA1	het	X	6742044	A	T	intergenic
NO UVA1	het	X	7001520	A	G	intron	tyra-2
NO UVA1	het	X	7211304	A	T	intergenic
NO UVA1	het	X	7250763	A	G	coding_exon	F46H5.4	missense	F->L
NO UVA1	het	X	7781448	A	G	intron	ZK154.4
NO UVA1	het	X	7781451	T	G	intron	ZK154.4
NO UVA1	hom	X	8200590	G	A	intron	C17H11.6
NO UVA1	het	X	8364651	A	T	intergenic
NO UVA1	het	X	8619677	T	G	intron	K01A12.2
NO UVA1	het	X	8833106	A	T	intron	sec-15
NO UVA1	het	X	9224394	A	C	intron	vav-1
NO UVA1	het	X	9453335	A	T	intergenic
NO UVA1	het	X	9453336	T	A	intergenic
NO UVA1	het	X	9463489	T	A	coding_exon	ZK899.6	missense	D->E
NO UVA1	het	X	9634883	A	G	coding_exon	F34H10.3	missense	V->A
NO UVA1	het	X	10121525	A	T	intron	unc-58
NO UVA1	het	X	10281039	A	T	intron	F41E7.1
NO UVA1	het	X	10312758	A	G	coding_exon	F41E7.9	readthrough	*->Q
NO UVA1	het	X	11306732	A	T	intergenic
NO UVA1	het	X	11400312	GAAA	GAA	intron	slo-2
NO UVA1	het	X	11674677	A	C	coding_exon	T04F8.9	missense	M->L
NO UVA1	het	X	11723923	A	C	intergenic
NO UVA1	het	X	11732036	A	G	intron	D1053.3
NO UVA1	het	X	11820287	A	T	intergenic
NO UVA1	het	X	12703121	A	T	intergenic
NO UVA1	het	X	12751850	A	T	intron	nhr-27
NO UVA1	het	X	13457813	A	C	intron	F02D10.3
NO UVA1	het	X	14068750	A	T	intergenic
NO UVA1	het	X	14199082	A	C	intron	ceh-37
NO UVA1	het	X	14534853	A	T	intergenic
NO UVA1	het	X	14589050	A	C	coding_exon	C44H4.4	missense	L->V
NO UVA1	het	X	15368613	A	T	intron	C33A11.2
NO UVA1	het	X	15476686	A	T	coding_exon	C46E1.3	missense	F->I
NO UVA1	het	X	15503398	A	T	intron	tbh-1
NO UVA1	het	X	15725514	A	T	intergenic
NO UVA1	het	X	15757462	A	T	intergenic
NO UVA1	het	X	15867310	A	C	coding_exon	F53H4.4	missense	M->L
NO UVA1	het	X	15918923	A	G	intron	F31B9.2
NO UVA1	het	X	16245050	A	C	intergenic
NO UVA1	het	X	16254812	A	G	intergenic
NO UVA1	het	X	16262906	A	T	intron	mua-6
NO UVA1	het	X	16414970	TAAAA	TAAA	intergenic
NO UVA1	het	X	16608728	TA	TAA	intron	F59C12.3
NO UVA1	het	X	16676415	A	T	intergenic
NO UVA1	het	X	17213634	A	T	coding_exon	acdh-10	missense	M->K
NO UVA1	het	X	17269638	A	G	coding_exon	C33E10.6	missense	Y->C
NO UVA1	het	X	17545185	A	T	intergenic
NO UVA2	het	II	12814652	C	T	intron	acl-7
NO UVA2	hom	III	1434583	A	T	intergenic
NO UVA2	het	III	3508183	A	T	coding_exon	M01F1.4	missense	I->N
NO UVA2	het	III	6722361	C	T	intergenic
NO UVA2	het	III	7309769	T	A	coding_exon	F56C9.6	missense	D->V
NO UVA2	het	III	8458786	A	C	intergenic
NO UVA2	het	III	8544517	A	G	intron	ZC21.6
NO UVA2	het	III	8586199	A	T	coding_exon	glr-1	missense	S->T
NO UVA2	het	III	8624462	A	T	intron	ceh-16
NO UVA2	het	III	8624524	G	A	intron	ceh-16
NO UVA2	het	III	8688217	A	T	intron	B0303.3
NO UVA2	het	III	9442464	A	T	coding_exon	F54C8.4	nonsense	Y->*
NO UVA2	het	III	9752420	A	T	coding_exon	ech-6	nonsense	L->*
NO UVA2	het	III	12524894	A	T	intron	Y111B2A.4
NO UVA2	het	III	13290256	A	T	intron	set-25
NO UVA2	het	III	13407823	A	T	intron	nas-1
NO UVA2	hom	IV	83497	T	C	intergenic
NO UVA2	hom	IV	83498	A	T	intergenic
NO UVA2	hom	IV	83499	T	A	intergenic
NO UVA2	hom	IV	2102856	T	A	intergenic
NO UVA2	hom	IV	5797002	T	G	ncRNA	21ur-2938
NO UVA2	hom	IV	6328359	T	A	intron	lsm-8
NO UVA2	hom	IV	6597192	T	C	coding_exon	F38A5.6	missense	I->V
NO UVA2	hom	IV	7661395	T	A	intron	C08G9.1
NO UVA2	hom	IV	7856207	T	A	intergenic
NO UVA2	het	IV	8467304	T	A	intron	oat-1
NO UVA2	het	IV	8467306	T	A	intron	oat-1
NO UVA2	het	IV	8467308	T	G	intron	oat-1
NO UVA2	het	IV	8467316	T	C	intron	oat-1
NO UVA2	hom	IV	9029581	C	A	intron	C53D6.6
NO UVA2	hom	IV	9957307	T	C	ncRNA	T13H10.7
NO UVA2	hom	IV	10106691	T	G	intergenic
NO UVA2	het	IV	13213345	T	A	coding_exon	cho-1	synonymous	T->T
NO UVA2	hom	IV	14025684	C	A	intergenic
NO UVA2	het	V	1656034	G	A	intron	K04F1.12
NO UVA2	het	V	6292032	T	G	intron	K12B6.9
NO UVA2	het	V	13982846	A	T	coding_exon	T26F2.2	synonymous	L->L
NO UVA2	het	V	13982848	G	A	coding_exon	T26F2.2	missense	L->F
NO UVA2	het	V	13982863	C	T	coding_exon	T26F2.2	missense	A->T
NO UVA2	het	V	16181200	G	A	coding_exon	str-106	missense	C->Y
NO UVA2	het	X	6200833	T	TAAG	intergenic
NO UVA2	hom	X	11591019	A	G	coding_exon	F52D10.2	synonymous	H->H
NO UVA2	hom	X	13200593	A	T	intergenic
NO UVA2	hom	X	13416758	A	G	coding_exon	C29F7.2	missense	H->R
NO UVA2	hom	X	13599567	T	A	UTR	bra-1
NO UVA2	hom	X	17450728	T	G	intergenic
NO UVA19	HOM	I	2163161	T	A	coding_exon	afd-1	missense	H->Q
NO UVA19	HOM	I	7382531	A	T	intron	unc-15
NO UVA19	HOM	I	10300375	A	T	coding_exon	T20F10.2	readthrough	*->L
NO UVA19	HOM	I	12088713	A	C	coding_exon	Y47H10A.3	missense	I->R
NO UVA19	HOM	I	12404577	A	G	intergenic
NO UVA19	HOM	I	12938991	A	T	intron	acox-1
NO UVA19	HOM	I	14169618	A	T	intergenic
NO UVA19	HOM	I	14333874	T	C	intron	F49B2.6
NO UVA19	HOM	I	14959552	GAAAGACTACAAA	GAAA	intergenic
NO UVA19	HOM	II	2803842	A	T	intergenic
NO UVA19	HOM	II	3191292	G	C	UTR	Y27F2A.9
NO UVA19	HOM	II	3522365	A	C	intron	col-72
NO UVA19	HOM	II	8400898	A	G	intron	F49E12.1
NO UVA19	HOM	II	9864156	T	C	coding_exon	C08H9.4	missense	I->M
NO UVA19	HOM	II	9864158	T	C	coding_exon	C08H9.4	missense	I->V
NO UVA19	HOM	II	9864174	C	T	coding_exon	C08H9.4	synonymous	L->L
NO UVA19	het	III	345270	T	G	intron	gei-4
NO UVA19	HOM	III	3185907	C	A	intergenic
NO UVA19	HOM	III	3185911	T	C	intergenic
NO UVA19	HOM	III	3185913	C	T	intergenic
NO UVA19	het	III	3226463	C	T	coding_exon	H09G03.1	missense	P->S
NO UVA19	HOM	III	3368842	TAGAGAG	TAGAG	intron	prk-2
NO UVA19	het	III	10070660	G	A	intron	T16G12.6
NO UVA19	het	III	10897872	A	T	intron	com-1
NO UVA19	HOM	III	11195856	T	A	intergenic
NO UVA19	het	III	11973382	A	T	coding_exon	ung-1	missense	F->L
NO UVA19	het	III	13035757	C	T	intron	F14F7.5
NO UVA19	het	III	13155627	T	A	intron	abce-1
NO UVA19	het	III	13155628	G	A	intron	abce-1
NO UVA19	het	III	13155630	A	G	intron	abce-1
NO UVA19	het	III	13155635	T	A	intron	abce-1
NO UVA19	het	III	13155636	C	A	intron	abce-1
NO UVA19	het	III	13155644	T	A	intron	abce-1
NO UVA19	het	III	13155647	T	C	intron	abce-1
NO UVA19	HOM	IV	998156	A	G	intergenic
NO UVA19	HOM	IV	5762475	C	T	intergenic
NO UVA19	HOM	IV	6523904	T	G	coding_exon	C01G5.6	synonymous	L->L
NO UVA19	HOM	IV	6574576	T	A	intergenic
NO UVA19	het	IV	6732345	A	C	intergenic
NO UVA19	HOM	IV	9461985	C	T	coding_exon	F38E11.5	synonymous	L->L
NO UVA19	HOM	IV	11577898	T	G	intron	srgp-1
NO UVA19	HOM	IV	13291603	T	A	coding_exon	Y67H2A.2	missense	N->I
NO UVA19	HOM	IV	14452922	A	G	intergenic
NO UVA19	HOM	IV	14906044	T	A	intron	pnc-2
NO UVA19	het	V	1708670	A	T	intergenic
NO UVA19	het	V	2201596	G	A	UTR	cyp-33C12
NO UVA19	het	V	4061929	T	A	intron	D1065.3
NO UVA19	het	V	4686008	A	G	intergenic
NO UVA19	het	V	4686010	C	T	intergenic
NO UVA19	het	V	4686012	A	G	intergenic
NO UVA19	het	V	4686016	T	A	intergenic
NO UVA19	het	V	6793473	T	C	intergenic
NO UVA19	het	V	8326125	C	G	intergenic
NO UVA19	HOM	V	8807612	G	A	coding_exon	rpm-1	missense	L->F
NO UVA19	het	V	11928864	A	C	coding_exon	aman-2	missense	D->E
NO UVA19	het	V	13440393	A	T	intergenic
NO UVA19	het	V	13666003	A	C	coding_exon	F58G11.2	synonymous	P->P
NO UVA19	het	V	14729861	T	A	intron	oig-3
NO UVA19	het	V	14818358	T	G	intergenic
NO UVA19	HOM	V	17188880	T	A	intergenic
NO UVA19	HOM	V	18047094	TAGAGAGA	TAGAGAGAGA	intron	ebp-1
NO UVA19	het	V	18681703	T	C	intron	Y69H2.10
NO UVA19	HOM	V	20106775	A	C	intron	ncx-1
NO UVA19	HOM	X	3845248	G	A	coding_exon	ceh-18	missense	S->F
NO UVA19	HOM	X	8142244	A	T	intergenic
NO UVA19	het	X	12466517	G	T	intron	cdf-2
NO UVA19	HOM	X	12721304	C	A	intron	nhr-27		*A20
NO UVA19	het	X	16504690	C	T	intergenic
NO UVA20	het	I	2295589	T	C	intron	Y39G10AR.11
NO UVA20	hom	I	8160885	T	A	intergenic
NO UVA20	het	I	10948271	G	A	intergenic
NO UVA20	hom	I	11499110	GTATGGTT	G	coding_exon	K08C9.6	frameshift
NO UVA20	het	I	13467077	A	T	intron	Y48G10A.4
NO UVA20	hom	I	13602423	A	G	coding_exon	Y87G2A.13	missense	Y->H
NO UVA20	hom	II	3698508	T	G	intergenic
NO UVA20	hom	II	3856193	T	C	coding_exon	C49D10.7	synonymous	Y->Y
NO UVA20	hom	II	4155940	G	T	intron	R03H10.2	splicing
NO UVA20	hom	II	4651028	A	C	intron	lgc-27
NO UVA20	hom	II	4651031	A	G	intron	lgc-27
NO UVA20	hom	II	5143610	T	A	intron	F58A6.1
NO UVA20	hom	II	5186396	T	A	intron	crh-2
NO UVA20	hom	II	9159499	C	A	coding_exon	oac-54	missense	T->K
NO UVA20	hom	II	12053822	T	A	intron	Y17G7B.10
NO UVA20	hom	II	13662554	A	G	intergenic
NO UVA20	het	III	345228	A	G	intron	gei-4
NO UVA20	het	III	345270	T	G	intron	gei-4
NO UVA20	het	III	345301	T	G	intron	gei-4
NO UVA20	het	III	345305	C	A	intron	gei-4
NO UVA20	hom	III	3227681	G	T	intron	H09G03.1
NO UVA20	het	III	5757524	T	A	intron	ida-1
NO UVA20	het	III	8367785	A	G	coding_exon	R05D3.9	synonymous	N->N
NO UVA20	het	III	11071433	T	A	intron	W09D6.1
NO UVA20	hom	III	12593757	T	A	intergenic
NO UVA20	hom	IV	784328	T	A	intergenic
NO UVA20	het	IV	3086909	A	T	UTR	Y67D8C.9
NO UVA20	hom	IV	3343059	A	G	intron	elks-1
NO UVA20	hom	IV	3810550	T	C	intron	M02B7.5
NO UVA20	hom	IV	7453455	GTTTTTTTTT	GTTTTTTTT	ncRNA	B0496.18
NO UVA20	hom	IV	8218506	ACTC	AC	intron	ocr-2
NO UVA20	hom	IV	8581894	A	T	intergenic
NO UVA20	hom	IV	8581895	T	A	intergenic
NO UVA20	hom	IV	9524115	A	T	intron	C33A12.1
NO UVA20	hom	IV	9784161	A	T	intron	sre-4
NO UVA20	het	IV	11145050	T	A	coding_exon	F01G4.4	missense	F->Y
NO UVA20	hom	IV	15074454	A	G	intergenic
NO UVA20	hom	IV	16799111	A	T	intergenic
NO UVA20	hom	IV	16799112	T	A	intergenic
NO UVA20	hom	IV	16972747	A	T	intergenic
NO UVA20	het	V	6181683	T	A	coding_exon	ttn-1	synonymous	T->T
NO UVA20	het	V	7719343	G	A	intergenic
NO UVA20	het	V	8085494	A	C	intergenic
NO UVA20	hom	V	8719478	A	C	coding_exon	glr-5	synonymous	V->V
NO UVA20	hom	V	9663548	A	T	intergenic
NO UVA20	het	V	11388554	T	A	coding_exon	F55C10.4	missense	I->K
NO UVA20	hom	V	15473187	T	A	intron	dpf-1
NO UVA20	hom	V	17490981	T	C	intron	K03D7.8
NO UVA20	het	V	18896937	C	T	intron	nhr-243
NO UVA20	hom	V	19912275	T	A	intron	chk-2
NO UVA20	hom	V	20753137	A	T	intron	pha-4
NO UVA20	hom	X	58437	T	A	intron	Y73B3A.18
NO UVA20	hom	X	2087115	A	T	intergenic
NO UVA20	hom	X	3311995	A	T	intergenic
NO UVA20	hom	X	4821691	GTT	GT	UTR	R08E3.3
NO UVA20	hom	X	11352584	A	T	intron	pgp-3
NO UVA20	het	X	13796054	G	C	intergenic
NO UVA20	hom	X	13840978	A	T	intergenic
UVA10	hom	I	594973	A	G	intron	hum-7
UVA10	hom	I	2072390	T	A	UTR	phb-1
UVA10	het	I	2214223	A	G	intergenic
UVA10	hom	I	2661775	T	A	intergenic
UVA10	hom	I	5375361	T	A	intron	pqn-44
UVA10	hom	I	5604861	T	C	intergenic
UVA10	hom	I	5800886	A	T	coding_exon	mtk-1	nonsense	Y->*
UVA10	hom	I	6225177	T	A	UTR	T08B2.4
UVA10	hom	I	6442080	T	A	intron	T23H2.3
UVA10	hom	I	6511356	T	A	intron	gly-2
UVA10	hom	I	7249627	T	A	coding_exon	lin-61	missense	Q->H
UVA10	hom	I	7500321	T	C	intron	pbrm-1
UVA10	hom	I	7574804	G	A	intron	D2030.2
UVA10	hom	I	8844103	T	A	intron	F29D10.3
UVA10	hom	I	9036309	T	A	intron	acr-19
UVA10	hom	I	9186630	T	G	intron	lim-9
UVA10	hom	I	11129018	G	T	intron	hmr-1
UVA10	hom	I	11129039	T	A	intron	hmr-1
UVA10	hom	I	11399940	T	A	intergenic
UVA10	hom	I	11765172	T	A	coding_exon	vab-10	missense	I->F
UVA10	hom	I	12054058	TAAAAA	TAAAAAA	intron	ksr-2
UVA10	hom	I	12098622	T	A	intergenic
UVA10	hom	I	12721325	G	T	intron	srw-88
UVA10	hom	I	13449893	A	T	coding_exon	spr-5	missense	E->V
UVA10	hom	I	14149104	A	T	intergenic
UVA10	hom	I	14647502	A	C	intergenic
UVA10	hom	I	14906825	T	A	intergenic
UVA10	hom	II	770928	T	G	intron	C08G5.6
UVA10	hom	II	1083456	T	C	coding_exon	K02E7.1	missense	S->P
UVA10	hom	II	1622636	T	C	intron	fbxa-159
UVA10	hom	II	4128246	GTTTT	GTTT	intron	ast-1
UVA10	hom	II	5851122	T	A	coding_exon	H41C03.2	missense	Q->H
UVA10	hom	II	11157783	T	A	intron	ptr-13
UVA10	hom	II	11315773	T	A	intergenic
UVA10	hom	II	11377007	C	T	intergenic
UVA10	hom	II	13624262	G	C	intron	gst-16
UVA10	hom	II	13624272	T	C	intron	gst-16
UVA10	hom	II	13785754	T	A	intergenic
UVA10	hom	II	14739259	T	G	intergenic
UVA10	hom	II	15007189	A	G	coding_exon	Y53F4B.9	synonymous	H->H
UVA10	hom	III	3808248	A	C	intron	toh-1
UVA10	hom	III	3997599	A	T	intergenic
UVA10	hom	III	4059597	A	G	intergenic
UVA10	hom	III	4264080	A	T	UTR	T08A11.2
UVA10	het	III	4535330	G	T	coding_exon	cdh-4	missense	K->N
UVA10	het	III	4878426	A	G	intergenic
UVA10	het	III	4897585	A	T	coding_exon	nhl-2	synonymous	V->V
UVA10	het	III	5172807	T	C	coding_exon	K10D2.5	synonymous	Y->Y
UVA10	het	III	5335581	G	A	intergenic
UVA10	het	III	5771088	T	A	intron	cutl-23
UVA10	het	III	6078590	T	A	intergenic
UVA10	het	III	6769621	T	A	coding_exon	dig-1	missense	D->E
UVA10	het	III	7514681	A	G	coding_exon	cls-1	synonymous	A->A
UVA10	het	III	8226209	T	A	UTR	C30A5.3
UVA10	het	III	8719389	T	A	intergenic
UVA10	het	III	9505757	T	C	intergenic
UVA10	het	III	9640131	T	G	ncRNA	C15H7.9
UVA10	het	III	10344673	G	T	intergenic
UVA10	het	III	11002546	T	C	intergenic
UVA10	het	III	11004768	G	A	intergenic
UVA10	het	III	11253031	A	G	intron	Y47D3A.32
UVA10	het	III	11533473	T	C	coding_exon	Y66D12A.15	missense	M->T
UVA10	het	III	11686414	T	G	intron	crh-1
UVA10	het	III	12311523	T	A	intron	pqn-92
UVA10	het	III	12683470	C	T	intron	elpc-2
UVA10	het	III	12950728	T	A	intergenic
UVA10	het	III	13155627	T	A	intron	abce-1
UVA10	het	III	13155628	G	A	intron	abce-1
UVA10	het	III	13155630	A	G	intron	abce-1
UVA10	het	III	13155635	T	A	intron	abce-1
UVA10	het	III	13155636	C	A	intron	abce-1
UVA10	het	III	13155647	T	C	intron	abce-1
UVA10	het	III	13211519	T	A	intergenic
UVA10	het	III	13319912	T	G	coding_exon	F53A2.11	missense	K->Q
UVA10	hom	IV	1766199	T	A	intergenic
UVA10	hom	IV	2840622	A	T	coding_exon	clec-83	missense	C->S
UVA10	hom	IV	3136334	A	G	intergenic
UVA10	hom	IV	4102041	A	T	intron	C35B1.2
UVA10	hom	IV	4583175	T	TA	coding_exon	F28E10.1	frameshift
UVA10	hom	IV	5616566	A	T	intron	srsx-16
UVA10	hom	IV	6158626	T	G	coding_exon	unc-77	missense	H->P
UVA10	hom	IV	6343604	T	G	intergenic
UVA10	hom	IV	7195545	A	T	coding_exon	R13A1.9	synonymous	I->I
UVA10	hom	IV	7606346	T	G	intergenic
UVA10	hom	IV	7606353	T	A	intergenic
UVA10	hom	IV	7717392	T	A	coding_exon	F33D4.6	missense	N->I
UVA10	hom	IV	7794958	T	G	UTR	sgo-1
UVA10	hom	IV	8220391	T	G	intergenic
UVA10	hom	IV	8603474	T	A	intergenic
UVA10	hom	IV	8720021	T	A	intron	H23L24.1
UVA10	hom	IV	8836726	T	C	intron	T28C6.7
UVA10	hom	IV	8860252	T	A	intron	alp-1
UVA10	hom	IV	10475736	T	A	intron	F01D4.9
UVA10	het	IV	10984971	A	G	UTR	Y43E12A.2
UVA10	hom	IV	11909263	A	G	intergenic
UVA10	hom	IV	12837593	A	T	intron	M02B1.3
UVA10	hom	IV	14017680	A	T	intron	Y37A1B.9
UVA10	hom	IV	14185868	A	C	intron	R05A10.1
UVA10	hom	IV	14299012	G	A	intron	Y64G10A.7
UVA10	hom	IV	14781359	A	T	intergenic
UVA10	hom	IV	15111678	A	C	intergenic
UVA10	hom	IV	15754296	TAAAA	TAAA	intergenic
UVA10	hom	IV	16830887	A	T	intergenic
UVA10	het	V	191781	A	C	intron	arid-1
UVA10	het	V	1420488	A	T	intergenic
UVA10	het	V	1965603	A	T	intergenic
UVA10	het	V	3174163	T	A	intergenic
UVA10	het	V	3204493	A	T	intergenic
UVA10	het	V	3594580	A	T	intron	srh-213
UVA10	het	V	3996335	A	G	intergenic
UVA10	het	V	4787467	T	C	coding_exon	R02F11.9	start_ATG	M->T
UVA10	het	V	5565548	A	G	intron	C18C4.7
UVA10	het	V	6039138	A	G	UTR	F29G9.1
UVA10	het	V	6039144	G	T	UTR	F29G9.1
UVA10	het	V	6131514	A	T	intron	ttn-1
UVA10	het	V	6423118	A	C	coding_exon	T05H4.10	nonsense	Y->*
UVA10	het	V	6770617	A	G	intron	srh-30
UVA10	het	V	6973892	T	G	intergenic
UVA10	het	V	7107557	T	C	intron	odr-2
UVA10	het	V	7205133	A	T	intron	F09G2.1
UVA10	het	V	7592610	A	T	intron	C50E3.5
UVA10	het	V	7644169	T	A	intergenic
UVA10	het	V	7652659	A	C	coding_exon	srh-200	missense	F->L
UVA10	het	V	9202016	A	T	coding_exon	asp-2	missense	Y->F
UVA10	het	V	9944226	A	G	intergenic
UVA10	het	V	10298072	A	T	coding_exon	B0024.4	missense	M->L
UVA10	het	V	10661570	A	G	intergenic
UVA10	het	V	10661589	C	A	intergenic
UVA10	het	V	10783724	A	C	intergenic
UVA10	het	V	10831614	A	G	intron	nrx-1
UVA10	het	V	11075171	T	TC	intergenic
UVA10	het	V	11082688	A	T	ncRNA	T04C12.29
UVA10	het	V	11366581	A	T	intergenic
UVA10	het	V	11510857	A	T	coding_exon	ttll-5	missense	N->I
UVA10	het	V	11790162	A	G	intron	D2023.1
UVA10	het	V	12086356	A	T	intergenic
UVA10	het	V	12136555	A	C	intron	C27A7.1
UVA10	het	V	12181074	A	G	coding_exon	elpc-3	missense	I->T
UVA10	het	V	12364528	T	A	intron	gcy-13
UVA10	het	V	12400869	A	T	intergenic
UVA10	het	V	12620926	A	T	coding_exon	ZC116.3	missense	E->D
UVA10	het	V	12774238	A	T	intron	ZC455.1
UVA10	het	V	12926430	A	T	coding_exon	pqn-67	missense	N->Y
UVA10	het	V	13025040	A	C	intron	fmi-1
UVA10	het	V	13499991	A	C	intron	avr-15
UVA10	het	V	14087447	T	A	intergenic
UVA10	het	V	14147636	A	C	coding_exon	acs-10	missense	H->P
UVA10	het	V	14170609	A	T	coding_exon	ZC376.3	missense	M->K
UVA10	het	V	14617328	A	T	intergenic
UVA10	het	V	14789059	A	G	intron	tag-333
UVA10	het	V	15073543	T	C	intron	unc-76
UVA10	hom	V	15437825	C	A	intergenic
UVA10	het	V	15855692	C	T	intergenic
UVA10	het	V	15855710	T	G	intergenic
UVA10	het	V	15855711	T	C	intergenic
UVA10	het	V	15855712	G	A	intergenic
UVA10	het	V	15855716	A	T	intergenic
UVA10	het	V	15855724	G	A	intergenic
UVA10	het	V	15855728	T	C	intergenic
UVA10	het	V	15855732	C	T	intergenic
UVA10	het	V	15855733	C	T	intergenic
UVA10	het	V	15855735	A	G	intergenic
UVA10	het	V	15857213	ATTGACGGAAGAT	A	coding_exon	srh-148	inframe	IFRQL->L
UVA10	het	V	16247801	T	G	coding_exon	srh-95	missense	I->M
UVA10	hom	V	16863805	A	C	coding_exon	clec-24	missense	Y->S
UVA10	het	V	16956652	A	T	intron	clec-239
UVA10	hom	V	17014195	A	T	intergenic
UVA10	hom	V	17648844	T	G	intron	fbxa-192
UVA10	hom	V	17743260	A	T	intergenic
UVA10	hom	V	18235872	A	G	coding_exon	R10E8.3	missense	M->T
UVA10	hom	V	18349258	A	T	intergenic
UVA10	hom	V	18917020	A	T	intron	cyp-42A1
UVA10	hom	V	20394631	A	C	coding_exon	cnc-7	missense	M->L
UVA10	hom	V	20810940	T	A	intron	Y44A6D.6
UVA10	hom	X	789606	T	G	intron	attf-5
UVA10	hom	X	844945	T	A	intergenic
UVA10	hom	X	2366305	A	T	intergenic
UVA10	hom	X	2692417	A	T	intergenic
UVA10	hom	X	2790774	A	T	intron	cgef-1
UVA10	hom	X	3078105	A	G	intergenic
UVA10	hom	X	4500563	A	C	intron	dgk-2
UVA10	hom	X	4573832	A	T	UTR	amt-1
UVA10	hom	X	4946434	A	T	intergenic
UVA10	hom	X	4992251	A	T	intron	ZC8.6
UVA10	hom	X	5237112	A	T	coding_exon	mtm-5	missense	M->K
UVA10	hom	X	5237115	C	T	coding_exon	mtm-5	missense	R->Q
UVA10	hom	X	5534827	A	T	intron	lgx-1
UVA10	hom	X	5700851	A	T	intergenic
UVA10	hom	X	5940344	A	T	coding_exon	acs-17	missense	M->K
UVA10	hom	X	6206755	A	T	intron	T13C5.6
UVA10	hom	X	6637898	A	C	coding_exon	nhr-120	missense	W->G
UVA10	hom	X	7121680	A	C	intergenic
UVA10	hom	X	9212934	T	G	intergenic
UVA10	hom	X	9285327	T	A	intergenic
UVA10	hom	X	10780337	T	G	coding_exon	sma-9	missense	I->S
UVA10	hom	X	12941579	C	T	coding_exon	C05E7.1	synonymous	L->L
UVA10	hom	X	14549812	T	G	ncRNA	T24C2.8
UVA10	hom	X	14955688	T	A	intergenic
UVA10	hom	X	16260172	T	A	intron	sgk-1
UVA10	het	X	16883418	T	C	intergenic
UVA10	hom	X	17433288	A	T	intergenic
UVA11	hom	I	1313652	T	G	intron	dapk-1
UVA11	hom	I	3294142	G	T	intron	W01B11.6
UVA11	hom	I	6636690	T	A	intron	D2092.1
UVA11	het	I	7973455	C	T	intron	H05L14.1
UVA11	hom	I	8394238	ACC	A	intergenic
UVA11	hom	I	8778944	A	C	intergenic
UVA11	hom	I	11650171	T	C	coding_exon	W04G5.8	synonymous	I->I
UVA11	hom	I	12622085	T	A	coding_exon	T07D10.2	missense	M->K
UVA11	het	I	14391802	A	C	intron	lev-10
UVA11	hom	I	14820745	T	A	intron	let-49
UVA11	hom	II	668543	T	C	intergenic
UVA11	hom	II	3281290	T	A	coding_exon	wht-4	missense	I->N
UVA11	hom	II	3881805	T	A	intron	nhr-166
UVA11	hom	II	4200986	T	C	coding_exon	F31D5.5	missense	H->R
UVA11	hom	II	5927892	A	T	intergenic
UVA11	het	II	7160520	ACCC	ACC	UTR	C27H5.2
UVA11	hom	II	7549876	T	A	coding_exon	tph-1	missense	S->T
UVA11	hom	II	8476275	T	A	intron	M05D6.3
UVA11	hom	II	9235696	T	A	coding_exon	T26C5.2	missense	C->S
UVA11	hom	II	9310106	A	T	intron	cam-1
UVA11	hom	II	9961775	T	A	intron	egl-43
UVA11	hom	II	10975898	T	A	intron	ptp-3
UVA11	hom	II	12143160	T	A	intron	Y57A10A.1
UVA11	hom	II	12353380	T	C	intergenic
UVA11	hom	II	13790008	T	A	intergenic
UVA11	hom	II	14928717	T	A	intron	pde-3
UVA11	hom	II	14940895	T	A	intron	pde-3
UVA11	het	III	160956	A	G	intron	ver-1
UVA11	hom	III	367130	CTTTTTTT	CTTTTTTTT	intron	pll-1
UVA11	hom	III	529795	T	A	intergenic
UVA11	hom	III	602892	T	C	coding_exon	Y55B1AR.3	missense	H->R
UVA11	hom	III	751533	A	T	intron	pat-12
UVA11	hom	III	886612	T	A	coding_exon	zer-1	missense	M->L
UVA11	hom	III	1580443	A	C	intron	Y22D7AL.7
UVA11	hom	III	1702838	T	A	intergenic
UVA11	hom	III	1702839	C	G	intergenic
UVA11	hom	III	1702844	T	C	intergenic
UVA11	hom	III	1702850	T	G	intergenic
UVA11	hom	III	1703090	A	T	intergenic
UVA11	hom	III	1703094	C	T	intergenic
UVA11	hom	III	1703106	T	A	intergenic
UVA11	hom	III	1703109	A	G	intergenic
UVA11	hom	III	1703110	T	A	intergenic
UVA11	hom	III	3047484	A	G	ncRNA	21ur-15022
UVA11	het	III	3413535	A	C	intergenic
UVA11	het	III	3566391	A	T	intergenic
UVA11	het	III	3732494	A	T	intron	F34D10.2
UVA11	het	III	4721607	A	G	intergenic
UVA11	het	III	4980468	A	C	intergenic
UVA11	het	III	5574281	T	C	intron	F09F7.1
UVA11	het	III	5682898	A	C	intron	rcn-1
UVA11	hom	III	5705880	TAAAAAAAAAAA	TAAAAAAAAAA	intron	rpl-23
UVA11	het	III	6361194	A	T	intron	C56G2.1
UVA11	het	III	6688951	A	C	intron	rbf-1
UVA11	het	III	6707798	A	T	coding_exon	isw-1	missense	D->E
UVA11	het	III	6895050	A	G	UTR	K04C2.2
UVA11	het	III	7041348	G	C	intron	R01H2.7
UVA11	het	III	7621448	A	G	intergenic
UVA11	het	III	7684361	A	T	intergenic
UVA11	het	III	7827353	T	C	coding_exon	egl-45	missense	K->R
UVA11	het	III	8662461	A	G	intron	dpy-19
UVA11	het	III	8686185	A	G	UTR	B0303.3
UVA11	het	III	9074021	T	G	intergenic
UVA11	het	III	9190521	A	C	intron	ZC84.7
UVA11	het	III	9405139	C	A	intron	T26G10.1
UVA11	het	III	9919099	T	G	coding_exon	F40F12.3	missense	K->T
UVA11	het	III	10339359	A	C	UTR	ttr-15
UVA11	het	III	10837742	A	C	intron	R17.3
UVA11	het	III	11229753	T	G	intergenic
UVA11	het	III	11766302	T	A	intron	gbf-1
UVA11	het	III	11916061	C	A	coding_exon	npp-16	missense	H->N
UVA11	het	III	11916062	A	C	coding_exon	npp-16	missense	H->P
UVA11	het	III	12725726	A	T	intron	ssl-1
UVA11	het	III	12892351	A	T	intergenic
UVA11	het	III	13042515	T	A	intron	F54F12.2
UVA11	het	III	13372371	T	G	intron	lis-1
UVA11	het	III	13488780	A	C	intron	twk-40
UVA11	het	III	13530021	T	C	intron	lron-13
UVA11	het	III	13669104	G	A	intergenic
UVA11	hom	IV	3887204	T	A	coding_exon	oac-22	missense	Y->N
UVA11	hom	IV	4496894	T	G	intron	gbb-2
UVA11	het	IV	6731262	A	G	intergenic
UVA11	hom	IV	9291852	A	T	intergenic
UVA11	hom	IV	9291855	C	T	intergenic
UVA11	hom	IV	12328842	G	A	intergenic
UVA11	het	V	540018	T	G	intron	nhr-155
UVA11	het	V	1118006	T	A	intron	W07B8.3
UVA11	het	V	1338834	T	A	intergenic
UVA11	het	V	1538877	A	T	coding_exon	oac-31	missense	W->R
UVA11	het	V	1538879	A	C	coding_exon	oac-31	missense	I->S
UVA11	het	V	1538882	G	T	coding_exon	oac-31	missense	P->Q
UVA11	het	V	1538883	G	C	coding_exon	oac-31	missense	P->A
UVA11	het	V	1538900	T	A	coding_exon	oac-31	missense	D->V
UVA11	het	V	1561451	ATTTTTTT	ATTTTTTTTT	intergenic
UVA11	het	V	1656666	T	A	coding_exon	K04F1.12	missense	I->K
UVA11	het	V	1977030	T	A	intron	fbxa-201	splicing
UVA11	het	V	2243023	T	A	coding_exon	cyp-33C3	missense	H->Q
UVA11	het	V	3522545	G	A	intergenic
UVA11	het	V	3679094	G	A	intergenic
UVA11	het	V	4433476	T	A	intergenic
UVA11	het	V	4953750	T	A	intergenic
UVA11	het	V	5139534	A	T	intron	F14F9.3
UVA11	het	V	6165423	T	A	coding_exon	ttn-1	missense	D->V
UVA11	het	V	7003168	T	A	intergenic
UVA11	het	V	7237559	T	A	coding_exon	hyls-1	start_ATG	M->K
UVA11	het	V	8694311	GAAA	GAAAGAAAA	intergenic
UVA11	het	V	9690304	A	T	coding_exon	rbx-1	missense	I->N
UVA11	het	V	10244472	A	G	intergenic
UVA11	het	V	11327552	G	C	intergenic
UVA11	het	V	11550893	A	T	coding_exon	F38B7.3	missense	I->F
UVA11	het	V	11589172	G	T	intergenic
UVA11	het	V	11600726	A	T	intergenic
UVA11	het	V	11848856	A	T	coding_exon	hmp-1	missense	I->F
UVA11	het	V	12090617	A	T	intron	R07B7.12
UVA11	het	V	12718142	T	C	coding_exon	str-181	missense	Y->C
UVA11	het	V	13833049	A	C	intergenic
UVA11	het	V	14673430	A	C	intergenic
UVA11	het	V	14935676	A	T	intergenic
UVA11	het	V	15724305	TAAAA	TAAA	intergenic
UVA11	het	V	16087622	T	C	intergenic
UVA11	het	V	16463681	T	A	coding_exon	T08G3.7	missense	D->E
UVA11	het	V	17146376	T	A	intergenic
UVA11	hom	V	19226238	T	G	intron	str-81
UVA11	hom	X	636864	T	A	UTR	pha-2
UVA11	hom	X	666941	A	C	intergenic
UVA11	hom	X	666944	T	A	intergenic
UVA11	hom	X	3071468	T	A	intergenic
UVA11	hom	X	3704926	T	C	intergenic
UVA11	hom	X	4260442	T	A	intergenic
UVA11	hom	X	4621188	T	A	intergenic
UVA11	hom	X	5996030	A	T	intergenic
UVA11	hom	X	6319558	T	A	intron	T10E10.4
UVA11	hom	X	7261883	T	G	intergenic
UVA11	hom	X	7390841	T	C	coding_exon	C10A4.6	synonymous	V->V
UVA11	hom	X	7901078	T	A	intergenic
UVA11	hom	X	8007313	T	C	intergenic
UVA11	hom	X	8256928	A	C	intergenic
UVA11	hom	X	8413816	A	C	coding_exon	F08F1.4	missense	N->T
UVA11	hom	X	8838632	C	T	intergenic
UVA11	hom	X	9232353	A	C	intergenic
UVA11	hom	X	9727142	A	G	intron	him-4
UVA11	hom	X	10304771	A	T	coding_exon	fipr-21	synonymous	S->S
UVA11	hom	X	11252504	A	T	intergenic
UVA11	hom	X	11728532	A	G	intron	D1053.2
UVA11	hom	X	13212474	A	G	coding_exon	unc-9	missense	I->V
UVA11	hom	X	13686648	T	G	intergenic
UVA11	hom	X	14959435	G	T	intergenic
UVA11	hom	X	16332898	G	C	intron	taf-3
UVA11	hom	X	16634420	G	T	intron	C06G1.1
UVA11	het	X	16787372	T	A	intron	T01C8.2
UVA11	hom	X	17432581	A	C	intron	pbo-6
UVA12	hom	I	658247	A	T	intron	Y65B4A.1
UVA12	hom	I	794709	T	C	intergenic
UVA12	hom	I	1753654	T	G	intron	Y71G12B.10
UVA12	hom	I	3721240	A	C	intergenic
UVA12	hom	I	4837123	C	G	intron	F57C9.3
UVA12	hom	I	4837227	T	G	intron	F57C9.3
UVA12	hom	I	5110795	A	T	coding_exon	Y110A7A.21	nonsense	Y->*
UVA12	hom	I	5438875	A	C	intron	F27C1.11
UVA12	hom	I	6092060	T	A	intergenic
UVA12	hom	I	6172718	T	A	miRNA	mir-1
UVA12	hom	I	8332471	T	G	coding_exon	C34B7.1	missense	C->G
UVA12	hom	I	8358560	C	A	UTR	rsd-6
UVA12	hom	I	9551534	T	A	intron	C36F7.2
UVA12	hom	I	9650675	T	TG	coding_exon	T05F1.13	frameshift
UVA12	hom	I	11041062	T	A	intron	Y52B11A.10
UVA12	hom	I	11577744	T	C	intergenic
UVA12	hom	I	12097278	T	C	coding_exon	Y47H10A.5	missense	N->S
UVA12	hom	I	13027551	A	T	intergenic
UVA12	hom	I	13027554	T	A	intergenic
UVA12	hom	I	13137121	T	A	intron	C17H1.7
UVA12	hom	I	14118505	T	C	UTR	Y63D3A.8
UVA12	hom	II	387776	T	G	coding_exon	C03H5.3	missense	D->E
UVA12	hom	II	2896499	A	C	intergenic
UVA12	hom	II	5110816	T	C	coding_exon	F09C12.2	synonymous	H->H
UVA12	hom	II	8175151	T	A	coding_exon	acr-14	missense	I->F
UVA12	hom	II	8867228	A	C	intergenic
UVA12	hom	II	8867235	A	T	intergenic
UVA12	hom	II	9448658	T	A	coding_exon	R09D1.5	missense	H->Q
UVA12	hom	II	10181993	T	A	intron	srd-1
UVA12	het	II	12430626	T	A	intergenic
UVA12	het	II	12467733	T	C	coding_exon	srg-16	start_ATG	M->T
UVA12	het	II	12610628	T	C	coding_exon	lips-16	synonymous	R->R
UVA12	het	II	12731004	T	G	intron	snrp-200
UVA12	het	II	13656929	A	T	coding_exon	C31C9.6	synonymous	L->L
UVA12	het	II	13885904	T	A	intron	hda-6
UVA12	het	II	13971272	A	T	intron	Y39G8B.1
UVA12	het	II	15040170	A	T	intron	asc-1
UVA12	het	III	452453	A	T	intergenic
UVA12	het	III	452456	G	A	intergenic
UVA12	hom	III	651320	T	C	intron	orai-1
UVA12	het	III	3526259	T	A	coding_exon	pitp-1	missense	M->L
UVA12	het	III	3585363	G	T	intergenic
UVA12	het	III	3923593	T	C	coding_exon	nit-1	missense	C->R
UVA12	het	III	3929082	T	A	coding_exon	F37A8.1	missense	I->N
UVA12	het	III	4284415	T	A	intergenic
UVA12	het	III	5208513	G	A	coding_exon	syn-16	missense	T->I
UVA12	het	III	5361033	T	C	intergenic
UVA12	het	III	5361034	T	C	intergenic
UVA12	het	III	5720463	A	C	ncRNA	B0336.16
UVA12	het	III	6305306	T	A	intergenic
UVA12	het	III	6400042	A	G	intergenic
UVA12	het	III	6889665	T	G	intergenic
UVA12	het	III	7180557	A	T	coding_exon	rpl-36	nonsense	K->*
UVA12	het	III	7197606	A	C	coding_exon	exos-9	missense	L->R
UVA12	het	III	8334282	A	C	intergenic
UVA12	het	III	8643906	T	C	intergenic
UVA12	het	III	9053567	A	G	intron	R107.5
UVA12	het	III	9117807	A	C	coding_exon	grl-11	missense	D->E
UVA12	het	III	9567394	A	T	intergenic
UVA12	het	III	9868317	A	T	intergenic
UVA12	het	III	10597964	A	C	intron	epg-6
UVA12	het	III	10762099	A	G	intron	K01G5.9
UVA12	het	III	11070528	A	T	coding_exon	W09D6.1	missense	H->L
UVA12	het	III	12269515	A	T	intron	Y75B8A.24
UVA12	het	III	12545258	A	T	intron	aakg-1
UVA12	het	III	12636973	A	T	intron	pqn-80
UVA12	hom	III	12745334	A	C	intergenic
UVA12	hom	III	13351695	A	G	coding_exon	mtm-6	missense	M->V
UVA12	hom	IV	423393	T	C	coding_exon	daf-18	missense	N->S
UVA12	hom	IV	922070	T	A	intergenic
UVA12	hom	IV	1208336	T	C	intergenic
UVA12	hom	IV	1864933	T	G	intron	pkg-1
UVA12	hom	IV	4267348	T	A	intergenic
UVA12	hom	IV	5173798	T	A	intron	lam-1
UVA12	hom	IV	5306501	T	A	intergenic
UVA12	hom	IV	6282971	C	T	coding_exon	ops-1	missense	R->K
UVA12	hom	IV	8443453	GT	GTT	intergenic
UVA12	het	IV	8467304	T	A	intron	oat-1
UVA12	het	IV	8467308	T	G	intron	oat-1
UVA12	hom	IV	12165122	T	A	intergenic
UVA12	hom	IV	15200403	G	T	coding_exon	sra-30	missense	T->N
UVA12	hom	IV	17337820	C	T	intron	C49C3.10
UVA12	het	V	1263227	A	C	intron	rab-1
UVA12	het	V	2148899	A	C	coding_exon	C45H4.13	missense	Y->D
UVA12	het	V	4190545	T	C	intron	Y45G5AM.9
UVA12	het	V	4471331	A	C	intergenic
UVA12	het	V	5289382	G	A	intergenic
UVA12	het	V	6020570	C	CT	intron	F29G9.2
UVA12	het	V	6516169	A	C	coding_exon	mdh-1	nonsense	Y->*
UVA12	het	V	7722302	A	T	intron	ZK105.6
UVA12	het	V	8001779	C	A	coding_exon	Y97E10AR.1	missense	T->K
UVA12	het	V	8011766	A	C	intron	rpb-9
UVA12	het	V	8256804	A	T	intergenic
UVA12	het	V	9097427	T	A	coding_exon	F21C10.9	missense	H->L
UVA12	het	V	9120910	T	C	coding_exon	F21C10.7	missense	M->T
UVA12	het	V	9947657	T	C	intron	T07C12.15
UVA12	het	V	11095211	T	A	coding_exon	Y42A5A.1	missense	M->K
UVA12	het	V	11375473	T	A	intergenic
UVA12	het	V	11381486	T	C	intergenic
UVA12	het	V	11397758	T	G	coding_exon	nas-18	synonymous	L->L
UVA12	het	V	12053943	T	A	intergenic
UVA12	het	V	12418656	T	A	coding_exon	C54D10.3	missense	C->S
UVA12	het	V	12517990	A	T	intergenic
UVA12	het	V	12517991	T	C	intergenic
UVA12	het	V	12749832	C	T	coding_exon	C15C8.5	missense	R->W
UVA12	het	V	12905136	T	A	UTR	ttr-28
UVA12	het	V	13880800	T	A	intron	T22G5.3
UVA12	het	V	14571698	T	A	intron	gar-3
UVA12	het	V	14688623	A	AT	intergenic
UVA12	het	V	15020044	T	C	intron	F14H8.2
UVA12	het	V	16310797	T	G	coding_exon	oac-7	missense	L->W
UVA12	het	V	16911462	T	A	intergenic
UVA12	hom	V	18013909	C	G	coding_exon	srh-133	missense	G->A
UVA12	hom	V	18383251	T	G	intergenic
UVA12	hom	V	18801072	T	A	intergenic
UVA12	hom	V	18880845	G	T	intron	emb-4
UVA12	hom	V	18880846	A	G	intron	emb-4
UVA12	hom	V	19709916	T	G	coding_exon	Y43F8C.15	synonymous	A->A
UVA12	hom	V	19805493	A	C	intergenic
UVA12	het	X	58529	T	C	intron	Y73B3A.18
UVA12	het	X	464484	A	T	intron	aagr-4
UVA12	het	X	540052	A	G	intergenic
UVA12	het	X	703086	A	C	UTR	irk-2
UVA12	het	X	1654857	A	G	intergenic
UVA12	het	X	2025581	T	G	intergenic
UVA12	het	X	2118896	A	T	coding_exon	gpa-5	readthrough	*->K
UVA12	het	X	2691382	T	A	intron	T14G11.1
UVA12	het	X	2716912	T	C	intron	unc-2
UVA12	het	X	3273553	T	G	intergenic
UVA12	het	X	3663852	G	C	coding_exon	R11G1.1	missense	R->S
UVA12	het	X	3776685	T	C	coding_exon	F47B7.2	synonymous	N->NA13
UVA12	hom	X	6072805	C	G	intron	ggr-2
UVA12	hom	X	6161669	T	A	intergenic
UVA12	hom	X	7314812	T	A	intergenic
UVA12	hom	X	7631842	T	C	intergenic
UVA12	hom	X	8351377	T	A	intergenic
UVA12	hom	X	14586475	G	A	coding_exon	C44H4.4	missense	T->I
UVA12	hom	X	17273709	G	C	coding_exon	C33E10.5	synonymous	T->T
UVA13	hom	I	11607299	C	T	intron	C17D12.7
UVA13	het	I	12710143	GCATGATCCATTGC	G	coding_exon	T06G6.3	frameshift
UVA13	het	I	13623156	GTTT	GTT	intron	agef-1
UVA13	hom	II	1344181	A	T	intron	jip-1
UVA13	hom	II	3019674	A	T	coding_exon	clec-3	missense	H->Q
UVA13	het	II	11460844	A	T	intron	aars-1
UVA13	hom	II	11709225	G	T	intron	VF13D12L.3
UVA13	hom	II	13884348	A	C	intron	hda-6
UVA13	hom	II	13884349	A	C	intron	hda-6
UVA13	hom	II	13884363	T	G	intron	hda-6
UVA13	hom	II	13884435	T	G	intron	hda-6
UVA13	hom	II	13884456	C	T	intron	hda-6
UVA13	hom	II	13884490	CTTTTATTT	CT	intron	hda-6
UVA13	hom	II	13936809	ATTT	AT	intergenic
UVA13	het	II	14851682	TC	T	intergenic
UVA13	hom	III	1371277	T	C	intergenic
UVA13	het	III	3967729	A	C	intron	msi-1
UVA13	het	III	4235039	T	G	intergenic
UVA13	het	III	8863978	T	G	intergenic
UVA13	het	III	11006508	T	A	intergenic
UVA13	het	III	12000308	A	T	intron	Y56A3A.33
UVA13	het	III	13223863	A	T	intron	Y43F4A.1
UVA13	het	IV	1722196	T	C	coding_exon	K08D12.6	synonymous	T->T
UVA13	het	IV	3182922	A	C	intergenic
UVA13	het	IV	3436960	A	T	coding_exon	srz-32	missense	I->L
UVA13	het	IV	3488877	A	T	intergenic
UVA13	het	IV	5059976	A	T	intergenic
UVA13	het	IV	7885637	A	T	intron	C55F2.1
UVA13	het	IV	11145050	T	A	coding_exon	F01G4.4	missense	F->Y
UVA13	het	IV	12014605	A	C	coding_exon	lips-6	missense	H->Q
UVA13	het	IV	12014607	G	C	coding_exon	lips-6	missense	H->D
UVA13	het	IV	14102302	A	T	coding_exon	F52B11.5	missense	D->E
UVA13	het	IV	15122853	T	A	intergenic
UVA13	het	IV	15191928	A	T	intergenic
UVA13	het	IV	15762575	A	T	ncRNA	21ur-12239
UVA13	hom	IV	16851459	A	G	intron	map-2
UVA13	het	V	2219282	T	A	intron	nhr-56
UVA13	het	V	4275600	A	T	intergenic
UVA13	het	V	4631785	A	T	coding_exon	pmt-2	missense	I->F
UVA13	het	V	5262467	T	G	intron	B0238.7
UVA13	het	V	5339747	T	A	intergenic
UVA13	het	V	7648271	A	T	coding_exon	F07C4.12	missense	Y->N
UVA13	het	V	7916963	G	A	intergenic
UVA13	het	V	9627546	A	C	coding_exon	T06E4.7	missense	I->L
UVA13	het	V	16291190	A	C	intergenic
UVA13	het	V	17453212	A	T	intergenic
UVA13	het	V	17676214	A	G	coding_exon	str-92	missense	F->S
UVA13	het	V	17684408	A	G	intron	F59A1.16
UVA13	het	X	1266660	T	C	intergenic
UVA13	het	X	1603297	G	T	intergenic
UVA13	hom	X	1764819	A	C	intergenic
UVA13	het	X	2544110	T	C	intron	F52H2.4
UVA13	het	X	2963895	T	C	intron	gbb-1
UVA13	hom	X	3133956	T	A	intergenic
UVA14	hom	I	616223	T	G	intron	F56A6.4
UVA14	hom	I	616600	T	G	intron	F56A6.4
UVA14	het	I	1370388	A	C	intron	Y92H12BL.5
UVA14	het	I	1829277	T	C	intergenic
UVA14	het	I	1888575	A	T	intron	Y71G12A.4
UVA14	het	I	1988954	A	T	intron	gap-3
UVA14	het	I	2482677	A	T	intron	abtm-1
UVA14	het	I	2498546	CAAAAAAAAA	CAAAAAAAA	intron	Y23H5B.5
UVA14	het	I	2785028	A	T	coding_exon	W03D8.9	missense	I->N
UVA14	het	I	3157268	T	A	intergenic
UVA14	het	I	3259625	T	A	intergenic
UVA14	het	I	3515044	T	C	intergenic
UVA14	het	I	3876108	T	A	UTR	T03F1.12
UVA14	het	I	4163182	T	A	coding_exon	inx-16	missense	D->E
UVA14	het	I	4445058	T	C	intron	eif-3.H
UVA14	het	I	4560281	T	A	intron	D1007.15
UVA14	het	I	5208068	A	T	coding_exon	sem-2	missense	H->Q
UVA14	het	I	5315793	A	T	intergenic
UVA14	het	I	5555470	A	G	intron	tom-1
UVA14	het	I	5583472	A	T	UTR	tag-163
UVA14	het	I	5761592	T	G	coding_exon	oxy-5	missense	Q->H
UVA14	het	I	5866617	T	G	UTR	F33D11.10
UVA14	het	I	5995054	A	C	coding_exon	unc-94	missense	I->S
UVA14	het	I	6009077	A	T	intron	C06A5.8
UVA14	het	I	6202020	T	A	coding_exon	vet-1	missense	K->I
UVA14	het	I	6234328	T	C	intergenic
UVA14	het	I	6251614	C	A	coding_exon	cof-2	missense	T->K
UVA14	het	I	6343868	A	T	intron	bli-4
UVA14	het	I	6343869	T	G	intron	bli-4
UVA14	het	I	6343870	G	A	intron	bli-4
UVA14	het	I	6691393	A	T	intron	ckr-1
UVA14	het	I	7183149	C	G	coding_exon	trpa-2	missense	R->G
UVA14	het	I	7467867	T	C	intergenic
UVA14	het	I	7503606	A	T	coding_exon	C26C6.8	missense	N->K
UVA14	het	I	7661655	A	C	intergenic
UVA14	hom	I	7882611	T	A	intergenic
UVA14	hom	I	7907089	A	G	UTR	F55D12.5
UVA14	hom	I	8306625	A	C	intron	abts-1
UVA14	hom	I	8426737	T	G	intergenic
UVA14	hom	I	9702691	A	G	intergenic
UVA14	hom	I	9721581	AGATTTTAAGCGGATTTTAAGCGGATTT	AGATTTTAAGCGGATTT	intron	ocrl-1
UVA14	hom	I	9982808	A	C	coding_exon	sys-1	missense	H->Q
UVA14	hom	I	10242630	A	G	intergenic
UVA14	hom	I	10611857	T	G	coding_exon	lam-3	missense	N->K
UVA14	hom	I	10960153	A	T	intergenic
UVA14	hom	I	11745473	A	T	coding_exon	Y47H9B.2	missense	N->I
UVA14	hom	I	12093164	A	C	coding_exon	Y47H10A.4	missense	D->E
UVA14	hom	I	12403501	A	T	coding_exon	E03H4.2	nonsense	Y->*
UVA14	hom	I	12879688	A	C	intron	pad-1
UVA14	hom	I	12914910	A	T	intergenic
UVA14	hom	I	13142554	C	A	intergenic
UVA14	hom	I	13602007	A	G	coding_exon	Y87G2A.13	synonymous	Y->Y
UVA14	hom	I	13931191	A	C	intergenic
UVA14	hom	I	13931192	A	T	intergenic
UVA14	hom	I	14021056	A	T	intron	ins-25
UVA14	hom	I	14176988	A	G	intron	pry-1
UVA14	hom	I	14347611	A	T	UTR	Y105E8A.2
UVA14	hom	I	14347613	A	G	UTR	Y105E8A.2
UVA14	hom	I	14610418	A	G	intergenic
UVA14	hom	I	14610420	T	C	intergenic
UVA14	hom	I	14610890	A	T	intergenic
UVA14	het	II	349854	T	A	coding_exon	dmsr-4	missense	H->L
UVA14	het	II	368833	T	A	intergenic
UVA14	het	II	564023	T	A	UTR	C09E8.1
UVA14	het	II	657478	T	A	intergenic
UVA14	het	II	712510	T	A	intron	T02H6.1
UVA14	hom	II	1120670	A	C	intergenic
UVA14	het	II	1131371	T	C	intron	taf-6.1
UVA14	het	II	1284453	T	C	coding_exon	Y57G7A.6	synonymous	V->V
UVA14	het	II	1315987	T	A	coding_exon	F56D12.6	missense	S->T
UVA14	het	II	1477584	T	C	intergenic
UVA14	het	II	1825034	T	A	coding_exon	math-41	nonsense	L->*
UVA14	het	II	2077031	T	C	intron	F07E5.9
UVA14	het	II	2175902	T	A	intergenic
UVA14	het	II	2539206	T	A	intron	K02F6.4
UVA14	het	II	2738119	A	T	intergenic
UVA14	het	II	2765864	T	G	coding_exon	fbxb-108	nonsense	Y->*
UVA14	het	II	2964409	T	A	intergenic
UVA14	het	II	3068632	T	A	intron	Y25C1A.7
UVA14	het	II	3233177	T	A	intron	C17F4.8
UVA14	het	II	3500080	T	A	UTR	col-71
UVA14	het	II	3555250	T	G	intergenic
UVA14	het	II	3648209	T	C	coding_exon	fbxb-33	synonymous	L->L
UVA14	het	II	3686627	T	G	intergenic
UVA14	het	II	3957589	T	A	intergenic
UVA14	het	II	4246760	T	C	intergenic
UVA14	het	II	4285537	T	G	intron	C01F1.6
UVA14	het	II	4344521	G	T	coding_exon	athp-2	synonymous	L->L
UVA14	het	II	4463853	T	G	intron	vps-18
UVA14	het	II	4502828	T	A	coding_exon	camt-1	missense	H->L
UVA14	het	II	4679827	T	C	coding_exon	T05A7.7	missense	I->V
UVA14	het	II	4686183	T	C	intergenic
UVA14	het	II	4861912	T	C	intergenic
UVA14	het	II	5283262	T	G	intergenic
UVA14	het	II	5596356	T	A	UTR	C17G10.2
UVA14	het	II	5815709	T	A	intergenic
UVA14	het	II	6129563	A	G	intergenic
UVA14	het	II	6168875	T	A	intron	hst-3.1
UVA14	het	II	6392467	T	A	intergenic
UVA14	het	II	6660766	A	G	intron	T19D12.3
UVA14	het	II	7021002	A	C	intron	C52E12.4
UVA14	het	II	7041989	A	C	intergenic
UVA14	het	II	7082312	A	C	coding_exon	T02G5.4	missense	M->L
UVA14	het	II	7161231	A	T	intergenic
UVA14	het	II	7824160	C	A	intergenic
UVA14	het	II	7945460	T	G	intergenic
UVA14	het	II	8094448	T	C	intergenic
UVA14	het	II	8472222	T	G	intergenic
UVA14	het	II	8680399	T	G	coding_exon	C34C6.2	missense	M->L
UVA14	hom	II	8723595	G	C	coding_exon	trcs-2	missense	A->P
UVA14	het	II	8812362	T	A	UTR	rer-1
UVA14	het	II	9112093	T	A	intergenic
UVA14	het	II	9156802	T	G	intergenic
UVA14	het	II	9511321	T	C	coding_exon	gcy-2	missense	I->V
UVA14	het	II	9886784	T	A	UTR	C08H9.2
UVA14	het	II	9900776	T	A	intergenic
UVA14	het	II	10049669	T	C	intergenic
UVA14	het	II	10216666	T	A	intergenic
UVA14	het	II	10334556	T	A	coding_exon	M02G9.1	missense	I->N
UVA14	het	II	10779484	A	T	coding_exon	ect-2	missense	I->N
UVA14	het	II	11112564	T	C	intergenic
UVA14	het	II	11156726	T	C	intergenic
UVA14	het	II	11691279	T	A	coding_exon	kel-1	missense	I->N
UVA14	het	II	11777284	T	A	coding_exon	patr-1	missense	I->F
UVA14	het	II	12090720	A	T	intergenic
UVA14	het	II	12507325	A	T	intergenic
UVA14	het	II	12613442	T	A	intergenic
UVA14	het	II	12772648	T	A	intron	tiar-2
UVA14	het	II	12803059	A	C	coding_exon	Y46G5A.18	synonymous	L->L
UVA14	het	II	12899255	A	T	intron	clec-64
UVA14	het	II	13119564	T	C	intron	F29C12.4
UVA14	het	II	13206150	A	T	intron	btf-1
UVA14	het	II	13442850	T	C	intergenic
UVA14	hom	II	13954049	TA	T	coding_exon	zip-3	frameshift
UVA14	hom	II	14190716	T	A	intergenic
UVA14	hom	II	14230653	A	C	intron	men-1
UVA14	hom	II	15073169	T	A	intergenic
UVA14	het	III	1940	A	C	coding_exon	fbxa-6	nonsense	L->*
UVA14	het	III	7530	A	C	intron	H10E21.2
UVA14	het	III	25903	G	T	intergenic
UVA14	het	III	304641	A	G	intron	Y50D7A.1
UVA14	het	III	526891	T	A	coding_exon	T22F7.4	missense	I->L
UVA14	het	III	563657	A	C	intron	B0353.1
UVA14	het	III	602236	G	C	intergenic
UVA14	het	III	1214358	A	T	intergenic
UVA14	het	III	1243660	A	C	intron	fbxa-63
UVA14	het	III	1450240	A	T	coding_exon	Y82E9BR.17	missense	D->E
UVA14	het	III	1528487	A	G	intron	snf-6
UVA14	het	III	1569798	T	A	coding_exon	Y67D2.2	missense	Y->N
UVA14	het	III	1696804	T	A	intergenic
UVA14	het	III	2367586	T	A	coding_exon	H04J21.1	synonymous	G->G
UVA14	het	III	2519334	A	G	intron	rbc-2
UVA14	het	III	2662394	A	G	intron	let-805
UVA14	het	III	2890035	T	A	intergenic
UVA14	het	III	2895998	T	A	coding_exon	T20B6.2	missense	I->N
UVA14	het	III	3027295	A	T	intron	daf-2
UVA14	het	III	3150508	A	T	intergenic
UVA14	het	III	3165111	A	T	intergenic
UVA14	het	III	3242296	A	C	intron	Y53G8AL.2
UVA14	het	III	3528033	A	T	intron	pitp-1
UVA14	het	III	3748056	A	C	intron	F34D10.6
UVA14	het	III	3748057	T	A	intron	F34D10.6
UVA14	het	III	3938602	C	A	intergenic
UVA14	het	III	3989971	T	A	intron	glb-11
UVA14	het	III	4227495	A	C	intron	mpk-1
UVA14	het	III	4491317	T	C	UTR	cpg-1
UVA14	het	III	4565545	T	C	coding_exon	pan-1	missense	M->T
UVA14	het	III	4572233	A	T	intron	sel-5
UVA14	het	III	4584866	A	T	intron	F35G12.5
UVA14	het	III	4621768	T	A	intron	F10F2.2
UVA14	het	III	4794387	T	A	coding_exon	C38D4.4	synonymous	V->V
UVA14	het	III	5150217	A	G	intergenic
UVA14	het	III	5416302	T	C	intron	dnj-24
UVA14	hom	III	5588512	A	G	coding_exon	F56D2.2	synonymous	K->K
UVA14	het	III	5615642	T	C	coding_exon	C05D2.3	missense	Y->H
UVA14	het	III	5729039	A	C	coding_exon	egg-1	missense	N->T
UVA14	het	III	6030856	T	C	ncRNA	ZK328.10
UVA14	het	III	6053742	A	T	coding_exon	F40H6.5	nonsense	Y->*
UVA14	het	III	6064945	A	T	intergenic
UVA14	het	III	6172504	T	C	intron	F42A10.5
UVA14	het	III	6219600	A	G	intergenic
UVA14	het	III	6227432	A	T	coding_exon	esyt-2	nonsense	L->*
UVA14	het	III	6359212	A	G	intron	C56G2.1
UVA14	het	III	6398672	A	T	intergenic
UVA14	het	III	6480302	A	C	coding_exon	zip-8	missense	M->L
UVA14	het	III	6610480	A	C	intergenic
UVA14	het	III	6678779	A	G	intron	rbf-1
UVA14	het	III	6798492	T	C	intron	R05H11.2
UVA14	het	III	6849187	A	C	intergenic
UVA14	het	III	7188612	TA	TAA	coding_exon	F37C12.21	frameshift
UVA14	het	III	7240185	A	G	coding_exon	pars-1	missense	N->S
UVA14	het	III	7519349	A	T	intron	cux-7
UVA14	het	III	7555725	A	G	coding_exon	ceh-13	missense	H->R
UVA14	het	III	7598271	A	C	intergenic
UVA14	het	III	7626176	A	T	intron	fbn-1
UVA14	het	III	7904657	A	T	intergenic
UVA14	het	III	8129510	A	T	intergenic
UVA14	het	III	8267692	A	C	coding_exon	mrps-9	missense	Q->H
UVA14	het	III	8400040	A	C	coding_exon	lap-1	missense	M->R
UVA14	het	III	8656008	A	C	intergenic
UVA14	het	III	8674633	A	T	coding_exon	pgl-2	missense	H->Q
UVA14	het	III	8792270	T	G	coding_exon	ztf-1	synonymous	T->T
UVA14	het	III	8881842	G	A	intergenic
UVA14	het	III	8889715	A	C	intron	ZK637.2
UVA14	het	III	9061886	A	T	coding_exon	lin-12	missense	M->K
UVA14	het	III	9153381	A	G	intron	nhl-1
UVA14	het	III	9319169	A	T	coding_exon	C40H1.2	missense	E->D
UVA14	het	III	9521759	A	T	intergenic
UVA14	het	III	9753333	A	C	intergenic
UVA14	het	III	9920059	A	G	intron	F40F12.3
UVA14	het	III	9946350	A	G	intergenic
UVA14	het	III	9996042	T	C	coding_exon	C05B5.4	synonymous	L->L
UVA14	het	III	10359630	T	C	intergenic
UVA14	het	III	10498122	A	T	intron	F43D9.1
UVA14	het	III	10735723	A	G	intergenic
UVA14	het	III	10850736	A	T	coding_exon	hex-3	missense	Y->F
UVA14	het	III	12053476	A	C	intron	arx-3
UVA14	het	III	12086635	A	T	intergenic
UVA14	het	III	12109538	A	G	intron	Y75B8A.4
UVA14	het	III	12262569	A	C	intron	Y75B8A.24
UVA14	het	III	12307609	A	T	intergenic
UVA14	het	III	12704206	A	G	intron	Y111B2A.24
UVA14	het	III	12753220	A	T	intron	ZC482.7
UVA14	het	III	12891091	A	G	intron	unc-71
UVA14	het	III	12933672	A	G	intergenic
UVA14	het	III	13436829	TAAA	TAA	intron	F45G2.9
UVA14	hom	IV	669099	T	A	coding_exon	K11H12.11	missense	I->L
UVA14	hom	IV	796808	A	C	intergenic
UVA14	hom	IV	1050593	T	A	intergenic
UVA14	hom	IV	1235029	T	A	intron	F38A1.8
UVA14	hom	IV	1503344	C	A	intron	Y77E11A.1
UVA14	hom	IV	1503346	C	G	intron	Y77E11A.1
UVA14	hom	IV	1540930	T	A	intergenic
UVA14	hom	IV	1870032	T	G	intron	pkg-1
UVA14	het	IV	1877165	A	T	intron	pkg-1
UVA14	hom	IV	2100871	T	G	intergenic
UVA14	hom	IV	2510113	A	C	coding_exon	Y69A2AR.16	missense	N->T
UVA14	hom	IV	2517533	T	G	intron	Y69A2AR.16
UVA14	hom	IV	2675196	T	A	intergenic
UVA14	hom	IV	3250331	T	C	intron	Y67D8A.2
UVA14	hom	IV	3576258	T	A	coding_exon	otpl-1	missense	I->N
UVA14	hom	IV	4156585	T	G	intron	K08D10.14
UVA14	hom	IV	4995992	A	T	intergenic
UVA14	hom	IV	5275501	T	A	intron	F36H12.17
UVA14	hom	IV	5366812	A	C	intergenic
UVA14	hom	IV	5527374	G	A	intergenic
UVA14	hom	IV	5558443	A	T	UTR	T12E12.1
UVA14	hom	IV	5784996	G	A	ncRNA	21ur-3108
UVA14	hom	IV	6375978	T	A	coding_exon	hrpf-2	missense	D->V
UVA14	hom	IV	6454985	T	A	intergenic
UVA14	hom	IV	6968407	T	A	coding_exon	ZK381.8	synonymous	A->A
UVA14	hom	IV	6968751	T	A	coding_exon	ZK381.8	synonymous	T->T
UVA14	hom	IV	7106420	T	A	intron	ZC477.10
UVA14	hom	IV	7600537	T	C	coding_exon	tag-80	synonymous	D->D
UVA14	hom	IV	7991795	T	A	UTR	rig-4
UVA14	hom	IV	8006661	AT	ATTGTGGAATTT	intergenic
UVA14	hom	IV	8015681	T	A	intergenic
UVA14	hom	IV	8104636	T	G	coding_exon	rabs-5	missense	I->L
UVA14	hom	IV	8127179	T	A	intron	F42G8.7
UVA14	hom	IV	8137302	A	T	intron	islo-1
UVA14	hom	IV	8206998	T	C	intron	C07G1.2
UVA14	hom	IV	8491335	T	A	intergenic
UVA14	hom	IV	8517804	A	C	intergenic
UVA14	hom	IV	8854759	T	A	coding_exon	alp-1	missense	H->Q
UVA14	hom	IV	8951910	A	AC	intergenic
UVA14	hom	IV	8951915	T	G	intergenic
UVA14	hom	IV	9088736	T	C	intron	ZC410.5
UVA14	hom	IV	9205949	T	A	coding_exon	wnk-1	synonymous	P->P
UVA14	hom	IV	9277891	T	A	intron	Y11D7A.14
UVA14	hom	IV	9357696	T	C	intergenic
UVA14	hom	IV	9537988	T	C	intergenic
UVA14	hom	IV	9842432	T	G	coding_exon	K07F5.17	missense	I->S
UVA14	hom	IV	10050920	T	C	coding_exon	T04B2.8	synonymous	G->G
UVA14	hom	IV	10502482	T	A	intergenic
UVA14	hom	IV	10562317	T	A	coding_exon	him-8	missense	N->K
UVA14	hom	IV	10668402	T	A	coding_exon	epi-1	missense	S->T
UVA14	hom	IV	12309876	T	C	coding_exon	oac-58	missense	N->S
UVA14	hom	IV	12518034	T	A	intergenic
UVA14	hom	IV	12580053	T	G	intron	K08E7.6
UVA14	hom	IV	12987251	A	C	intron	K10D11.6
UVA14	hom	IV	13258846	G	T	intron	bus-12
UVA14	het	IV	13853062	T	A	intergenic
UVA14	het	IV	13876635	GTTTTT	GTTTTTT	intergenic
UVA14	het	IV	14020930	T	C	coding_exon	Y37A1B.8	missense	C->R
UVA14	het	IV	14183827	T	A	intron	R05A10.1
UVA14	het	IV	14296473	T	G	intron	Y64G10A.7
UVA14	hom	IV	14443526	CTTTTTTTTTTT	CTTTTTTTTTT	intron	tra-3
UVA14	het	IV	14981269	T	C	intergenic
UVA14	het	IV	15031641	T	A	coding_exon	fcd-2	missense	W->R
UVA14	het	IV	15515548	T	G	coding_exon	Y73F8A.33	missense	N->K
UVA14	het	IV	15544357	T	A	ncRNA	21ur-11400
UVA14	het	IV	15799753	T	A	coding_exon	Y105C5A.22	start_ATG	M->L
UVA14	het	IV	15806116	T	C	intergenic
UVA14	het	IV	15867932	T	C	intergenic
UVA14	het	IV	15951851	T	G	intergenic
UVA14	het	IV	16115201	T	C	intergenic
UVA14	het	IV	16130825	TAAAAA	TAAAAAA	intergenic
UVA14	het	IV	16173674	T	A	intergenic
UVA14	het	IV	16362476	C	G	intergenic
UVA14	het	IV	16489720	T	C	intergenic
UVA14	het	IV	16509645	T	C	intergenic
UVA14	het	IV	16737530	A	T	intron	Y51H4A.25
UVA14	het	IV	17003421	A	T	intron	rom-4
UVA14	het	IV	17003422	T	G	intron	rom-4
UVA14	het	IV	17199475	AC	ACC	intron	C52D10.12
UVA14	het	IV	17199478	T	C	intron	C52D10.12
UVA14	het	IV	17335040	T	A	coding_exon	C49C3.15	missense	F->L
UVA14	het	V	228097	T	G	intergenic
UVA14	het	V	573272	T	A	intron	C14C6.13
UVA14	het	V	937907	T	G	intron	Y50D4C.2
UVA14	het	V	1131319	T	A	intron	W07B8.4
UVA14	het	V	1316114	T	A	intron	F16B3.3
UVA14	het	V	1392093	T	C	intergenic
UVA14	het	V	1564312	T	A	intergenic
UVA14	het	V	1588470	T	A	intergenic
UVA14	het	V	1863051	T	C	intergenic
UVA14	het	V	1994413	T	A	intergenic
UVA14	het	V	2612218	T	A	intron	acr-17
UVA14	het	V	2662975	T	A	UTR	ndx-2
UVA14	het	V	2718682	T	A	coding_exon	srt-29	missense	M->L
UVA14	het	V	2759443	T	C	coding_exon	srg-58	synonymous	P->P
UVA14	het	V	2775847	A	T	intron	srj-18
UVA14	het	V	2831261	T	A	coding_exon	srw-2	missense	I->N
UVA14	het	V	2864103	T	A	intron	srh-272
UVA14	het	V	2865504	T	A	intron	srh-240
UVA14	het	V	3051752	T	C	coding_exon	F59D6.1	synonymous	Y->Y
UVA14	het	V	3271059	A	T	coding_exon	T28A11.5	missense	M->L
UVA14	het	V	3381580	A	T	intron	C04E12.10
UVA14	het	V	3588577	T	A	intron	T22F3.2
UVA14	het	V	3622104	T	C	intergenic
UVA14	het	V	4078227	T	C	coding_exon	srh-211	missense	Y->C
UVA14	het	V	4156289	T	A	intergenic
UVA14	het	V	4329663	T	A	intron	oac-12
UVA14	het	V	4382479	A	C	intergenic
UVA14	het	V	4415704	T	C	intergenic
UVA14	het	V	4415706	T	A	intergenic
UVA14	het	V	4778345	T	C	intron	C18G1.1
UVA14	het	V	4840295	T	G	intergenic
UVA14	het	V	5132635	T	A	intergenic
UVA14	het	V	5197000	T	G	coding_exon	Y47A7.2	synonymous	T->T
UVA14	het	V	5288541	T	A	intergenic
UVA14	het	V	5294722	T	C	intergenic
UVA14	het	V	5521819	T	A	intergenic
UVA14	het	V	5546208	T	C	intron	ugt-48
UVA14	het	V	5762656	T	A	coding_exon	C53A3.2	missense	Q->L
UVA14	het	V	5762657	G	T	coding_exon	C53A3.2	missense	Q->K
UVA14	het	V	5865864	T	A	intergenic
UVA14	het	V	6237222	T	C	coding_exon	K08B12.3	missense	F->S
UVA14	het	V	6319936	T	A	intron	T28C12.4
UVA14	het	V	6381834	T	C	intergenic
UVA14	het	V	7102404	T	A	intergenic
UVA14	het	V	7326237	T	C	intergenic
UVA14	het	V	7373031	T	G	intergenic
UVA14	het	V	7523737	T	A	coding_exon	C54F6.6	start_ATG	M->K
UVA14	het	V	7552450	T	G	coding_exon	F19F10.3	missense	F->L
UVA14	het	V	7558305	G	T	coding_exon	ets-7	missense	P->Q
UVA14	het	V	7565714	T	G	intergenic
UVA14	het	V	7626634	T	A	intergenic
UVA14	het	V	7648243	C	A	coding_exon	F07C4.12	missense	G->V
UVA14	het	V	7837186	A	G	UTR	ttr-33
UVA14	het	V	7905460	A	G	intergenic
UVA14	het	V	7977134	A	T	coding_exon	let-413	nonsense	L->*
UVA14	het	V	8012274	A	G	coding_exon	rpb-9	synonymous	Y->Y
UVA14	het	V	8171483	T	C	intergenic
UVA14	het	V	8304888	A	T	intergenic
UVA14	het	V	8910759	A	G	coding_exon	mod-1	missense	M->T
UVA14	het	V	8910760	T	C	coding_exon	mod-1	missense	M->V
UVA14	het	V	8931585	A	T	intergenic
UVA14	het	V	8960670	T	G	coding_exon	T19A5.1	nonsense	Y->*
UVA14	het	V	9188925	T	C	intergenic
UVA14	het	V	9231014	T	A	coding_exon	F07C3.3	missense	M->L
UVA14	het	V	9589976	T	A	coding_exon	K09G1.1	missense	I->N
UVA14	het	V	9673717	A	G	intergenic
UVA14	het	V	10136476	C	A	intron	C08B6.8
UVA14	het	V	10158642	A	T	intergenic
UVA14	het	V	10192449	A	T	intergenic
UVA14	het	V	10375775	T	G	intergenic
UVA14	het	V	11133417	A	T	intergenic
UVA14	het	V	11248136	A	T	intergenic
UVA14	het	V	11385733	A	G	coding_exon	col-154	missense	D->G
UVA14	het	V	11458748	A	C	ncRNA	T11F9.30
UVA14	het	V	11466058	G	T	coding_exon	tag-140	nonsense	E->*
UVA14	het	V	11605768	A	C	coding_exon	F35B12.3	missense	S->A
UVA14	het	V	11824283	A	G	intergenic
UVA14	het	V	11965883	A	G	intergenic
UVA14	het	V	12482789	A	T	coding_exon	atn-1	missense	K->I
UVA14	het	V	12665073	T	A	intergenic
UVA14	het	V	12771277	T	G	intergenic
UVA14	het	V	12904232	T	G	intergenic
UVA14	het	V	13264370	A	C	intergenic
UVA14	het	V	13655197	A	T	intergenic
UVA14	het	V	13772540	A	C	coding_exon	F20G2.5	missense	Y->S
UVA14	het	V	13918396	T	A	intergenic
UVA14	het	V	14569412	T	A	intron	gar-3
UVA14	hom	V	15082942	A	C	intron	C01G10.9
UVA14	hom	V	15444321	A	T	intergenic
UVA14	hom	V	16017518	A	T	intergenic
UVA14	hom	V	16128216	CT	CTT	intergenic
UVA14	hom	V	16232489	A	T	UTR	F21H7.3
UVA14	hom	V	17401955	A	C	intergenic
UVA14	hom	V	17488897	A	T	intergenic
UVA14	hom	V	17488898	T	A	intergenic
UVA14	hom	V	17703813	T	G	intergenic
UVA14	hom	V	18709093	A	T	intergenic
UVA14	hom	V	18774406	C	T	intergenic
UVA14	hom	V	19053566	T	A	intergenic
UVA14	hom	V	19137781	A	G	coding_exon	Y39B6A.9	missense	D->G
UVA14	hom	V	19246849	T	C	intergenic
UVA14	hom	V	19291616	A	T	intergenic
UVA14	hom	V	19291628	A	T	intergenic
UVA14	hom	V	19704877	A	C	intron	ani-3
UVA14	hom	V	20361801	A	G	intron	grd-11
UVA14	hom	V	20558497	T	A	intergenic
UVA14	hom	V	20703053	A	C	intron	F53F8.5
UVA14	hom	V	20741263	A	C	intron	dnj-25
UVA14	het	X	52235	G	GT	intron	Y73B3A.18
UVA14	het	X	439852	T	A	intergenic
UVA14	het	X	582917	T	C	coding_exon	mrp-1	missense	H->R
UVA14	het	X	628968	T	A	intergenic
UVA14	het	X	832034	T	G	coding_exon	F39H12.2	missense	M->R
UVA14	het	X	883937	T	C	intron	mam-1
UVA14	het	X	1095624	T	G	coding_exon	F49E7.2	missense	Y->S
UVA14	het	X	1099246	T	A	coding_exon	rme-6	synonymous	L->L
UVA14	het	X	1522386	T	C	intergenic
UVA14	het	X	2067218	A	T	intron	acl-4
UVA14	het	X	2245545	G	T	coding_exon	AH9.1	missense	L->I
UVA14	het	X	2330896	A	T	intergenic
UVA14	het	X	2975216	A	C	intergenic
UVA14	het	X	3441279	A	T	intergenic
UVA14	het	X	3636555	T	A	intergenic
UVA14	het	X	3878980	A	T	intergenic
UVA14	het	X	3940498	A	C	UTR	prl-1
UVA14	het	X	4147735	A	T	intergenic
UVA14	het	X	4346358	A	C	intergenic
UVA14	het	X	4359048	A	T	intergenic
UVA14	het	X	4359050	A	G	intergenic
UVA14	het	X	4397270	A	T	intergenic
UVA14	het	X	4586572	A	G	intergenic
UVA14	hom	X	4765443	C	A	intergenic
UVA14	hom	X	4765444	A	C	intergenic
UVA14	hom	X	4765445	T	A	intergenic
UVA14	hom	X	5130588	T	A	intergenic
UVA14	hom	X	5204248	A	T	intergenic
UVA14	hom	X	5224421	A	G	intergenic
UVA14	hom	X	5393829	A	T	intron	kcnl-3
UVA14	hom	X	5586886	C	T	intron	mec-2
UVA14	hom	X	5825236	A	T	coding_exon	hbl-1	missense	D->V
UVA14	hom	X	6205809	A	T	intron	mtp-18
UVA14	hom	X	6520356	A	T	intron	ets-4
UVA14	hom	X	6939384	A	G	intergenic
UVA14	hom	X	7176686	A	T	intergenic
UVA14	hom	X	7698451	T	A	intron	kvs-1
UVA14	hom	X	8238163	A	T	intergenic
UVA14	hom	X	8338015	A	T	intergenic
UVA14	hom	X	8640550	T	G	intron	stg-2
UVA14	hom	X	8670249	A	T	intron	rig-1
UVA14	hom	X	8806980	A	T	coding_exon	R04E5.9	missense	D->E
UVA14	hom	X	9680184	A	T	intergenic
UVA14	hom	X	10114812	GTTTTTTTTTT	GTTTTTTTTTTT	intron	unc-58
UVA14	hom	X	10449922	T	A	intergenic
UVA14	hom	X	10494566	A	T	intron	C33D3.5
UVA14	hom	X	11296918	A	T	intergenic
UVA14	hom	X	11664115	A	G	intergenic
UVA14	hom	X	11721332	A	G	intergenic
UVA14	hom	X	12529870	A	T	intergenic
UVA14	hom	X	12890882	A	T	intergenic
UVA14	hom	X	13007725	A	G	intergenic
UVA14	hom	X	13270316	A	T	intergenic
UVA14	hom	X	13352473	A	T	intergenic
UVA14	hom	X	14431671	C	T	intergenic
UVA14	hom	X	14446675	T	G	intergenic
UVA14	hom	X	14615580	A	T	coding_exon	rbc-1	missense	H->L
UVA14	hom	X	14690303	C	A	intergenic
UVA14	hom	X	14992157	T	A	ncRNA	F20D1.16
UVA14	hom	X	14992158	T	A	ncRNA	F20D1.16
UVA14	het	X	15045036	A	G	intron	fbxa-97
UVA14	hom	X	15707512	A	T	intergenic
UVA14	hom	X	15945175	A	C	intron	mec-5
UVA14	hom	X	16146195	A	T	intron	F09C8.2
UVA14	hom	X	16161808	A	C	intron	F09C8.1
UVA14	hom	X	17092312	A	G	intron	C08A9.3
UVA14	hom	X	17368341	ATTT	AATTTT	intron	F10D7.2
UVA14	hom	X	17455317	A	T	coding_exon	C36E6.2	missense	Q->L
UVA14	hom	X	17611742	A	G	intergenic
UVA14	hom	X	17685532	T	C	intergenic
UVA15	hom	I	562851	A	T	coding_exon	Y65B4BR.1	missense	D->V
UVA15	hom	I	562852	T	A	coding_exon	Y65B4BR.1	missense	D->E
UVA15	hom	I	562854	C	G	coding_exon	Y65B4BR.1	missense	A->G
UVA15	hom	I	688882	G	C	intron	Y18H1A.1
UVA15	hom	I	1554533	T	C	intron	Y92H12A.2
UVA15	hom	I	1836141	C	T	intron	egl-30
UVA15	hom	I	2756318	A	T	coding_exon	plk-2	missense	M->K
UVA15	hom	I	3435402	T	A	coding_exon	2018-09-01	missense	M->L
UVA15	hom	I	3527464	A	C	intron	Y47G6A.19
UVA15	hom	I	3635701	A	T	intron	jmjc-1
UVA15	hom	I	4316632	C	T	intergenic
UVA15	het	I	4477940	A	G	intergenic
UVA15	hom	I	4797584	A	T	intergenic
UVA15	hom	I	4981427	A	C	coding_exon	snf-1	missense	Q->H
UVA15	hom	I	5043378	A	T	UTR	C46H11.7
UVA15	hom	I	5363449	A	T	intron	ppk-1
UVA15	hom	I	5431429	A	G	UTR	F27C1.2
UVA15	hom	I	5486577	A	T	UTR	C09D4.6
UVA15	hom	I	5585614	A	T	intron	tag-163
UVA15	hom	I	5893283	C	A	intron	pgp-2
UVA15	hom	I	6002318	A	C	intergenic
UVA15	hom	I	6194769	A	C	intron	T05E7.4
UVA15	hom	I	6604979	A	T	intron	maco-1
UVA15	hom	I	6953046	A	T	intron	T10B11.8
UVA15	hom	I	7735060	A	C	coding_exon	F27D4.6	missense	D->A
UVA15	hom	I	7744023	A	G	intergenic
UVA15	hom	I	7829872	A	C	coding_exon	glna-3	missense	M->R
UVA15	hom	I	7941729	T	A	UTR	T22C1.5
UVA15	hom	I	8134686	A	T	coding_exon	T28B8.1	missense	N->I
UVA15	hom	I	9444903	A	T	intron	mec-8
UVA15	hom	I	9608149	T	A	intron	aqp-9
UVA15	hom	I	10979378	T	A	intron	Y52B11A.3
UVA15	hom	I	11147946	T	A	coding_exon	clec-94	missense	D->E
UVA15	het	I	11660370	A	C	intergenic
UVA15	het	I	11736101	T	A	intergenic
UVA15	het	I	12921989	T	A	intergenic
UVA15	het	I	13396363	T	G	intergenic
UVA15	hom	I	14610418	A	G	intergenic
UVA15	hom	I	14610420	T	C	intergenic
UVA15	hom	II	102950	TA	T	intergenic
UVA15	hom	II	812139	A	T	intergenic
UVA15	hom	II	2364888	A	T	intergenic
UVA15	hom	II	2517423	C	T	intergenic
UVA15	hom	II	3233697	C	A	intron	C17F4.8
UVA15	hom	II	4505067	A	G	coding_exon	camt-1	synonymous	H->H
UVA15	hom	II	4804908	A	T	intron	rig-6
UVA15	hom	II	5722459	A	C	intron	rab-3
UVA15	hom	II	6200927	A	G	coding_exon	tag-319	synonymous	L->L
UVA15	hom	II	6472342	A	T	intergenic
UVA15	hom	II	7644780	A	C	intron	pde-4
UVA15	hom	II	7819979	A	T	UTR	cki-2
UVA15	hom	II	8644246	A	T	intergenic
UVA15	hom	II	9763830	A	T	intron	shk-1
UVA15	hom	II	9784647	A	T	intron	cyp-13A2
UVA15	hom	II	10049454	A	G	intergenic
UVA15	hom	II	10119956	A	T	coding_exon	lov-1	missense	S->T
UVA15	hom	II	10530324	A	T	intergenic
UVA15	hom	II	11004125	A	T	intron	ptp-3
UVA15	hom	II	11221257	A	T	intergenic
UVA15	hom	II	12644035	A	G	intergenic
UVA15	hom	II	12673289	A	T	UTR	Y38E10A.22
UVA15	hom	II	13072195	TAAAA	TAAA	intergenic
UVA15	hom	II	13186225	A	C	coding_exon	mecr-1	missense	H->Q
UVA15	hom	II	13195136	A	C	intergenic
UVA15	hom	II	13779213	T	A	intron	C01B9.4
UVA15	hom	II	13790726	T	G	intergenic
UVA15	hom	II	14462143	T	A	intron	dmsr-6
UVA15	hom	II	15204536	TG	TGG	intergenic
UVA15	hom	II	15204539	T	C	intergenic
UVA15	het	III	860168	T	A	intergenic
UVA15	het	III	1395065	A	T	intergenic
UVA15	het	III	1476550	A	G	intron	Y82E9BR.18
UVA15	het	III	2136635	T	G	coding_exon	frl-1	missense	I->S
UVA15	het	III	2523659	A	T	intron	rbc-2
UVA15	het	III	3882952	A	C	intron	tir-1
UVA15	het	III	4052373	A	G	intergenic
UVA15	het	III	4906322	A	T	intergenic
UVA15	het	III	5041140	T	A	intergenic
UVA15	het	III	5251076	A	T	coding_exon	C34E10.8	nonsense	Y->*
UVA15	het	III	5251077	T	A	coding_exon	C34E10.8	missense	Y->F
UVA15	het	III	5570530	A	C	intergenic
UVA15	het	III	5703358	A	G	coding_exon	swp-1	synonymous	I->I
UVA15	het	III	6312734	T	A	intron	gar-2
UVA15	het	III	6312736	T	A	intron	gar-2
UVA15	het	III	6673873	T	G	intergenic
UVA15	het	III	6846326	A	C	coding_exon	ten-1	missense	H->P
UVA15	het	III	6912251	T	A	coding_exon	pdf-1	synonymous	P->P
UVA15	het	III	7874479	A	T	intron	tyr-1
UVA15	het	III	8322605	A	T	intergenic
UVA15	het	III	9008485	A	G	coding_exon	F59B2.8	missense	M->T
UVA15	het	III	9163753	T	TC	intron	dgk-3
UVA15	het	III	9202719	A	T	coding_exon	ZC84.1	missense	C->S
UVA15	het	III	9853990	A	T	intergenic
UVA15	het	III	10069785	T	C	intron	T16G12.6
UVA15	het	III	10168317	A	T	intron	mua-3
UVA15	het	III	10284302	A	T	intergenic
UVA15	het	III	10456850	A	T	coding_exon	D2045.2	synonymous	I->I
UVA15	het	III	10589557	A	C	intergenic
UVA15	het	III	10809871	A	T	coding_exon	klp-7	missense	M->L
UVA15	het	III	11613895	A	G	intron	Y66A7A.4
UVA15	het	III	11640662	A	T	intergenic
UVA15	het	III	11734589	A	G	intron	Y41C4A.13
UVA15	het	III	11766262	A	T	intron	gbf-1
UVA15	het	III	11935028	A	T	intron	Y56A3A.7
UVA15	het	III	11942461	A	G	intron	Y56A3A.7
UVA15	het	III	12847035	A	G	intergenic
UVA15	het	III	12847074	A	T	intergenic
UVA15	het	III	12847075	T	A	intergenic
UVA15	het	III	12956605	A	G	intron	ttm-1
UVA15	het	III	13325571	A	G	intergenic
UVA15	het	III	13402054	A	T	intergenic
UVA15	het	III	13567204	A	T	intron	T05D4.3
UVA15	het	III	13606346	T	A	intergenic
UVA15	hom	IV	1027475	A	C	intergenic
UVA15	het	IV	1273954	A	G	intron	clec-170
UVA15	het	IV	1659987	A	T	UTR	rps-28
UVA15	het	IV	1876596	A	T	intron	pkg-1
UVA15	het	IV	1894014	T	G	intergenic
UVA15	het	IV	2138581	A	G	intron	C54E4.2
UVA15	het	IV	2222587	A	T	intergenic
UVA15	het	IV	3016340	T	G	intergenic
UVA15	het	IV	3055715	T	G	coding_exon	Y67D8C.3	start_ATG	M->R
UVA15	het	IV	3732792	T	A	intron	smgl-2
UVA15	het	IV	3988760	T	A	intergenic
UVA15	het	IV	4110268	G	A	coding_exon	C35B1.7	missense	C->Y
UVA15	het	IV	4772995	T	A	intron	R11E3.2
UVA15	het	IV	4820205	T	A	intron	H06H21.8
UVA15	het	IV	5552363	T	A	intron	T12E12.1
UVA15	het	IV	5756654	T	G	intron	nhr-46
UVA15	het	IV	5921354	A	C	coding_exon	H32C10.3	synonymous	G->G
UVA15	het	IV	6114008	T	A	intergenic
UVA15	het	IV	6441884	T	A	intergenic
UVA15	het	IV	6729859	A	T	intergenic
UVA15	het	IV	6946001	T	C	intergenic
UVA15	het	IV	7422880	T	A	intergenic
UVA15	het	IV	7422883	T	A	intergenic
UVA15	het	IV	7567111	T	A	intergenic
UVA15	het	IV	7823188	A	T	intergenic
UVA15	het	IV	7882485	A	T	coding_exon	C55F2.1	missense	H->L
UVA15	het	IV	8034628	T	C	intergenic
UVA15	het	IV	8108511	T	A	intron	Y42H9AR.4
UVA15	het	IV	9505342	T	G	intergenic
UVA15	het	IV	9649598	T	C	coding_exon	srm-3	missense	S->P
UVA15	het	IV	10184773	T	A	coding_exon	K04D7.4	missense	D->V
UVA15	het	IV	10196356	T	G	intergenic
UVA15	het	IV	10198063	T	A	coding_exon	gon-4	missense	I->N
UVA15	het	IV	10296023	T	G	intergenic
UVA15	het	IV	10717102	T	A	coding_exon	ncx-3	nonsense	Y->*
UVA15	het	IV	10747167	A	T	intron	T25B9.3
UVA15	het	IV	10747168	T	A	intron	T25B9.3
UVA15	het	IV	10747866	C	T	intron	T25B9.3
UVA15	het	IV	11216061	G	T	intron	zip-6
UVA15	het	IV	11259189	T	C	intron	gtl-1
UVA15	het	IV	11330757	T	G	coding_exon	B0035.12	missense	N->T
UVA15	het	IV	11363175	T	A	intergenic
UVA15	het	IV	11489223	T	G	intron	sms-1
UVA15	het	IV	11528732	T	C	coding_exon	M04B2.2	missense	C->R
UVA15	het	IV	12842412	T	C	intergenic
UVA15	het	IV	13506181	T	A	coding_exon	seld-1	missense	C->S
UVA15	het	IV	13806895	T	A	intron	Y45F10D.14
UVA15	het	IV	13840612	A	C	intron	rga-5
UVA15	het	IV	14169811	A	T	intron	R05A10.5
UVA15	het	IV	14812851	ATTT	ATT	intergenic
UVA15	het	IV	14904313	A	G	intergenic
UVA15	het	IV	14904318	TG	TGG	intergenic
UVA15	het	IV	15270966	A	G	intron	ccg-1
UVA15	het	IV	15320167	G	A	intergenic
UVA15	het	IV	15342648	A	G	intergenic
UVA15	het	IV	15783607	A	T	intergenic
UVA15	het	IV	16135677	A	C	intergenic
UVA15	het	IV	17053146	A	T	intergenic
UVA15	het	IV	17210353	A	T	intergenic
UVA15	het	IV	17252065	A	T	intron	ZK550.3
UVA15	het	IV	17395010	A	T	intergenic
UVA15	het	V	468628	A	G	intergenic
UVA15	het	V	509608	A	T	intergenic
UVA15	het	V	1964218	A	G	coding_exon	srj-15	missense	I->T
UVA15	het	V	2023076	A	G	intron	F59A7.5
UVA15	het	V	2317432	T	A	intron	Y19D10B.5
UVA15	het	V	3356272	A	T	intron	scrm-3
UVA15	het	V	4574273	T	A	intron	Y61A9LA.3
UVA15	het	V	5310872	A	T	UTR	ncx-2
UVA15	het	V	5427898	A	T	intergenic
UVA15	het	V	5667491	A	G	intergenic
UVA15	het	V	6549563	A	T	intergenic
UVA15	het	V	6697066	TA	T	intron	W02F12.2
UVA15	het	V	7141254	A	C	coding_exon	ugt-40	missense	Y->D
UVA15	het	V	7639525	A	T	coding_exon	F07C4.10	missense	D->E
UVA15	het	V	7741806	C	T	intergenic
UVA15	het	V	7861687	A	T	intergenic
UVA15	het	V	7960856	A	T	coding_exon	F26D11.2	synonymous	S->S
UVA15	het	V	8727854	A	G	intron	ZC196.6
UVA15	het	V	9422768	A	T	intron	F36D4.5
UVA15	het	V	9507816	T	C	intergenic
UVA15	het	V	10061735	T	G	intergenic
UVA15	het	V	10719688	T	G	intron	T28B11.1
UVA15	het	V	10990623	AT	A	intergenic
UVA15	het	V	11190142	T	A	ncRNA	K10D6.16
UVA15	het	V	11372864	T	A	intergenic
UVA15	het	V	11466383	T	A	coding_exon	tag-140	missense	M->K
UVA15	het	V	11692078	T	G	intergenic
UVA15	het	V	11798842	T	A	intron	D2023.1
UVA15	het	V	12167941	A	T	intergenic
UVA15	het	V	13303839	T	A	intron	ceh-79
UVA15	het	V	13387332	T	A	intron	somi-1
UVA15	het	V	14096622	A	G	intron	D1086.8
UVA15	het	V	14096625	ATTTT	ATTT	intron	D1086.8
UVA15	het	V	14096649	T	G	intron	D1086.8
UVA15	het	V	14260601	A	T	coding_exon	F40G12.2	missense	S->T
UVA15	het	V	14607594	A	T	intergenic
UVA15	het	V	15185045	T	C	intron	Y75B12B.1
UVA15	het	V	15253583	A	T	intergenic
UVA15	het	V	15526114	A	T	intergenic
UVA15	het	V	15725540	A	C	coding_exon	Y6E2A.8	missense	L->R
UVA15	het	V	15728243	A	G	coding_exon	sfxn-1.3	missense	H->R
UVA15	het	V	15728246	T	G	coding_exon	sfxn-1.3	missense	V->G
UVA15	het	V	15742295	A	G	intergenic
UVA15	het	V	15780568	A	C	coding_exon	T26E4.1	synonymous	P->P
UVA15	het	V	15781386	A	T	intergenic
UVA15	het	V	15781387	T	A	intergenic
UVA15	het	V	16427375	A	G	coding_exon	F26D2.10	missense	S->P
UVA15	het	V	16710741	A	G	intergenic
UVA15	het	V	17198523	A	T	intergenic
UVA15	het	V	17919848	T	G	intron	C06H5.8
UVA15	hom	V	18443956	A	T	intergenic
UVA15	hom	V	20753184	A	T	intron	pha-4
UVA15	hom	X	861425	T	A	intron	F56F10.2
UVA15	hom	X	1294303	T	G	intergenic
UVA15	hom	X	4292920	A	C	intron	paf-2
UVA15	hom	X	9002539	A	T	coding_exon	C24A3.1	missense	M->L
UVA15	hom	X	9027870	A	T	coding_exon	T25B6.3	missense	I->F
UVA15	hom	X	9353549	A	G	intergenic
UVA15	hom	X	9924552	T	C	intron	ugt-23
UVA15	hom	X	10637535	A	G	intergenic
UVA15	hom	X	12690785	A	T	intergenic
UVA15	hom	X	13949951	G	A	intron	alg-1
UVA15	hom	X	14625968	GTTTT	GTTTTT	intron	F54E4.2
UVA15	hom	X	15504669	AT	A	intron	tbh-1
UVA15	hom	X	15798565	T	A	intron	Y7A5A.6
UVA15	hom	X	16386433	T	G	intron	let-2
UVA15	hom	X	16430017	T	A	intergenic
UVA15	hom	X	16895902	A	T	coding_exon	F39F10.2	missense	I->F
UVA15	hom	X	16895905	A	T	coding_exon	F39F10.2	missense	N->YA16
UVA16	het	I	404190	A	C	intron	Y50C1A.1
UVA16	het	I	509805	A	T	coding_exon	Y65B4BL.7	missense	D->E
UVA16	het	I	974364	T	A	intergenic
UVA16	het	I	1568928	A	G	intron	src-1
UVA16	het	I	2426943	A	T	intergenic
UVA16	het	I	2659429	A	C	intergenic
UVA16	het	I	3081406	A	T	intron	M01B12.4
UVA16	het	I	3100207	A	G	intergenic
UVA16	het	I	3430608	A	G	intron	K03E5.1
UVA16	het	I	3515051	A	G	intergenic
UVA16	het	I	4615418	TAA	TA	intron	C44E4.1
UVA16	het	I	4634175	T	A	coding_exon	C44E4.4	nonsense	Y->*
UVA16	het	I	4844840	A	T	intergenic
UVA16	het	I	5295198	A	T	intergenic
UVA16	het	I	5717560	T	A	intron	lim-7
UVA16	het	I	6333669	A	T	intergenic
UVA16	het	I	6503924	A	T	intergenic
UVA16	het	I	6812500	A	T	intergenic
UVA16	het	I	7116071	TAAAAAAA	TAAAAAA	intergenic
UVA16	het	I	7248431	A	G	coding_exon	R06C7.5	synonymous	H->H
UVA16	het	I	7248434	C	G	coding_exon	R06C7.5	missense	K->N
UVA16	het	I	7392915	A	G	intron	sol-1
UVA16	het	I	7461333	G	T	UTR	ZK524.4
UVA16	hom	I	9267758	G	A	intron	F14B4.1
UVA16	hom	I	9864782	A	C	coding_exon	K10C3.5	missense	M->L
UVA16	hom	I	11087293	T	C	intron	hmr-1
UVA16	het	I	11645651	A	C	intergenic
UVA16	hom	I	11918806	A	G	intron	fdps-1
UVA16	hom	I	13866394	A	T	coding_exon	taf-1	synonymous	P->P
UVA16	hom	II	725269	T	C	intron	Y39F10B.1
UVA16	hom	II	2367855	A	T	intron	F16G10.5
UVA16	hom	II	2446988	A	C	intron	vab-19
UVA16	het	II	4473448	T	A	UTR	W06B4.1
UVA16	het	II	4569257	ATTT	ATT	intergenic
UVA16	hom	II	5009109	T	A	coding_exon	F59A6.3	missense	H->Q
UVA16	hom	II	5438655	T	G	intron	F07F6.1
UVA16	hom	II	7330200	T	A	intron	npax-1
UVA16	hom	II	7686017	T	A	intron	F18A1.1
UVA16	hom	II	7958803	T	A	intergenic
UVA16	hom	II	8252615	C	G	intron	F35C11.5
UVA16	hom	II	9543064	CA	CAA	intergenic
UVA16	hom	II	10270626	T	A	intron	F54B3.4
UVA16	hom	II	12357316	T	G	intergenic
UVA16	hom	II	12935558	T	A	intergenic
UVA16	hom	II	14740457	T	G	intergenic
UVA16	hom	III	136552	G	T	coding_exon	T17A3.2	synonymous	S->S
UVA16	hom	III	136570	A	T	coding_exon	T17A3.2	missense	E->D
UVA16	hom	III	690240	A	T	intron	elf-1
UVA16	het	III	2183260	A	G	coding_exon	gcn-1	missense	K->E
UVA16	het	III	2257865	A	C	intron	fbxa-43
UVA16	hom	III	2967985	A	G	coding_exon	H05C05.3	missense	S->P
UVA16	het	III	3312504	G	T	intron	ral-1
UVA16	het	III	4681078	T	A	coding_exon	srg-11	missense	M->K
UVA16	het	III	5293314	A	C	intron	T15B12.1
UVA16	het	III	5808963	C	T	coding_exon	R12B2.2	missense	L->F
UVA16	het	III	6292428	A	T	intergenic
UVA16	het	III	6722361	C	T	intergenic
UVA16	het	III	7281390	A	T	intergenic
UVA16	het	III	8196310	T	G	coding_exon	unc-36	missense	M->L
UVA16	het	III	8370205	A	G	intergenic
UVA16	het	III	8672844	A	T	coding_exon	kin-31	missense	Q->L
UVA16	het	III	9566668	T	C	intergenic
UVA16	het	III	9613371	A	T	coding_exon	pri-1	nonsense	Y->*
UVA16	het	III	9774397	A	T	intron	cbp-1
UVA16	het	III	9986061	A	G	intergenic
UVA16	het	III	9986064	C	A	intergenic
UVA16	het	III	9986066	A	G	intergenic
UVA16	het	III	10020369	A	T	intergenic
UVA16	het	III	11167958	A	T	intron	cku-70
UVA16	het	III	11875535	G	A	intron	Y56A3A.6
UVA16	het	III	12202623	A	T	intergenic
UVA16	het	III	13311204	A	T	intron	Y43F4B.7
UVA16	het	III	13487414	A	C	coding_exon	twk-40	missense	F->C
UVA16	het	IV	589317	A	T	coding_exon	C18H7.13	missense	L->Q
UVA16	het	IV	1352457	A	G	intron	rfc-2
UVA16	het	IV	1895772	A	C	intergenic
UVA16	het	IV	2005859	A	T	intron	xpc-1
UVA16	het	IV	2005861	A	T	intron	xpc-1
UVA16	het	IV	2109933	A	G	intron	cng-4
UVA16	hom	IV	2747592	A	G	intergenic
UVA16	het	IV	3790758	A	C	intergenic
UVA16	het	IV	4529882	A	T	intron	ZK185.3
UVA16	het	IV	4602215	C	CTG	intron	F19C7.2
UVA16	het	IV	4871111	A	C	intergenic
UVA16	hom	IV	5723099	C	T	ncRNA	21ur-5153
UVA16	het	IV	5762856	CAA	CAAA	intergenic
UVA16	het	IV	5985074	A	C	intron	unc-44
UVA16	het	IV	6623663	A	T	intergenic
UVA16	het	IV	7159004	A	T	intron	C34D4.1
UVA16	het	IV	7999432	A	G	coding_exon	rig-4	missense	I->T
UVA16	het	IV	8467304	T	A	intron	oat-1
UVA16	het	IV	8467306	T	A	intron	oat-1
UVA16	het	IV	8467308	T	G	intron	oat-1
UVA16	het	IV	8467316	T	C	intron	oat-1
UVA16	het	IV	9694941	T	A	intron	twk-9
UVA16	het	IV	10173858	A	C	intron	pxf-1
UVA16	het	IV	10522803	A	C	intergenic
UVA16	het	IV	11494529	A	C	intron	sms-1
UVA16	het	IV	12046620	C	T	intron	T12G3.2
UVA16	het	IV	12593765	A	T	coding_exon	pgp-1	missense	M->K
UVA16	het	IV	13462896	A	T	intergenic
UVA16	het	IV	13662966	A	G	intergenic
UVA16	het	IV	13663008	A	T	intergenic
UVA16	het	IV	14049624	A	C	intergenic
UVA16	het	IV	14802425	A	T	intergenic
UVA16	het	IV	14809624	A	T	coding_exon	Y57G11C.50	missense	Q->L
UVA16	het	IV	14952958	A	T	intron	Y41E3.22
UVA16	het	IV	15197554	A	T	intron	sra-30
UVA16	het	IV	15384021	A	T	intergenic
UVA16	het	IV	15637826	A	T	intron	srg-19
UVA16	het	IV	15729237	A	C	ncRNA	21ur-6439
UVA16	het	IV	15925495	A	G	intron	Y105C5B.8
UVA16	het	IV	16245180	A	T	intergenic
UVA16	het	IV	16535557	A	C	intergenic
UVA16	het	IV	16606358	A	T	intergenic
UVA16	het	IV	16913180	A	C	intergenic
UVA16	het	IV	17025397	A	T	intergenic
UVA16	het	IV	17430293	A	G	coding_exon	lact-6	synonymous	D->D
UVA16	het	V	100055	T	C	intergenic
UVA16	het	V	1390236	A	T	intergenic
UVA16	het	V	3035006	A	T	intergenic
UVA16	het	V	3359557	CA	C	coding_exon	C04E12.5	frameshift
UVA16	het	V	3871306	TA	TAA	coding_exon	nhr-158	frameshift
UVA16	het	V	4272108	A	G	intergenic
UVA16	het	V	5799848	A	T	UTR	cyn-17
UVA16	het	V	10725681	C	T	intron	T28B11.1
UVA16	het	V	10725684	A	T	intron	T28B11.1
UVA16	het	V	11170461	A	T	intergenic
UVA16	het	V	11295217	A	T	coding_exon	T03F7.6	missense	M->L
UVA16	het	V	11411607	C	T	intron	grl-3
UVA16	het	V	11955409	A	T	intergenic
UVA16	het	V	12296591	A	T	intergenic
UVA16	het	V	12400807	A	T	UTR	K01D12.6
UVA16	het	V	12437481	CAAAAAA	CAAAAA	intergenic
UVA16	het	V	12443657	A	T	intron	dct-3
UVA16	het	V	12528760	A	G	intergenic
UVA16	het	V	14421828	G	A	coding_exon	pas-1	synonymous	T->T
UVA16	het	V	14924090	T	C	coding_exon	srg-54	missense	R->G
UVA16	het	V	14924092	T	A	coding_exon	srg-54	missense	Y->F
UVA16	hom	V	17257836	A	C	intergenic
UVA16	hom	X	767887	T	C	coding_exon	trap-2	synonymous	T->T
UVA16	hom	X	2366529	A	T	intergenic
UVA16	hom	X	3783130	T	C	intergenic
UVA16	het	X	4043582	G	A	intergenic
UVA16	hom	X	4068965	A	C	intron	T06F4.1
UVA16	hom	X	4110795	A	T	coding_exon	F09F9.2	missense	D->E
UVA16	hom	X	4110796	T	A	coding_exon	F09F9.2	missense	D->V
UVA16	hom	X	4824415	A	T	intron	R08E3.2
UVA16	hom	X	6710710	G	T	coding_exon	acr-3	missense	V->L
UVA16	hom	X	6925484	A	T	intron	F14B8.5
UVA16	hom	X	8302109	A	T	intron	inx-5
UVA16	hom	X	12161093	A	T	intergenic
UVA16	hom	X	12902164	A	T	intergenic
UVA16	hom	X	17450728	T	G	intergenic
UVA17	hom	I	760867	A	T	UTR	mps-3
UVA17	hom	I	1362463	A	C	intergenic
UVA17	hom	I	2145448	GAAAAA	GAAAA	intron	Y37E3.17
UVA17	hom	I	2157618	A	T	intergenic
UVA17	hom	I	2330600	A	T	intergenic
UVA17	hom	I	2898051	A	G	coding_exon	Y71F9AL.17	missense	M->T
UVA17	hom	I	4024922	A	C	coding_exon	unc-73	missense	I->M
UVA17	het	I	4477940	A	G	intergenic
UVA17	hom	I	4906422	A	T	intergenic
UVA17	hom	I	5226615	A	C	intergenic
UVA17	hom	I	5631681	A	C	coding_exon	F46F11.1	missense	Q->P
UVA17	hom	I	6757819	A	C	coding_exon	gpc-2	missense	N->H
UVA17	hom	I	8319043	A	G	coding_exon	F52B5.3	missense	M->T
UVA17	hom	I	8326673	A	T	intron	cep-1
UVA17	hom	I	8437055	GA	G	coding_exon	F10D11.2	frameshift
UVA17	hom	I	8475451	A	G	coding_exon	D1081.4	missense	F->S
UVA17	hom	I	8528080	A	G	intron	K02B12.7
UVA17	hom	I	8587774	A	C	intergenic
UVA17	hom	I	9042191	A	G	intergenic
UVA17	hom	I	9655223	A	C	coding_exon	T05F1.11	missense	H->P
UVA17	hom	I	10280187	A	T	intergenic
UVA17	hom	I	10469424	A	T	intron	duo-3
UVA17	hom	I	11979660	A	C	intron	rga-2
UVA17	hom	I	12085434	A	C	intron	Y47H10A.2
UVA17	hom	I	12085435	TG	TGG	intron	Y47H10A.2
UVA17	hom	I	14900479	A	T	intergenic
UVA17	hom	II	1765675	T	G	intron	math-28
UVA17	hom	II	1765676	G	C	intron	math-28
UVA17	hom	II	2724882	T	A	intron	nep-2
UVA17	hom	II	2816536	T	A	intergenic
UVA17	hom	II	5451084	T	C	intergenic
UVA17	hom	II	6635549	T	C	coding_exon	T19D12.5	missense	M->V
UVA17	hom	II	7053433	A	C	coding_exon	ZK1127.13	missense	D->A
UVA17	het	II	7600614	A	C	coding_exon	npp-21	synonymous	S->S
UVA17	het	II	7883571	GGTAAGTAAG	GGTAAG	intergenic
UVA17	hom	II	7905307	A	T	coding_exon	ZK675.3	nonsense	Y->*
UVA17	hom	II	8091603	A	C	intron	ltd-1
UVA17	hom	II	8468660	A	G	coding_exon	M05D6.2	synonymous	E->E
UVA17	hom	II	9043328	A	T	coding_exon	T24B8.7	missense	Y->N
UVA17	hom	II	9657353	A	T	coding_exon	gstk-1	synonymous	V->V
UVA17	hom	II	9880908	A	T	intergenic
UVA17	hom	II	10051811	C	A	intergenic
UVA17	hom	II	10204699	A	T	intergenic
UVA17	hom	II	10308633	A	T	coding_exon	gcy-4	missense	M->K
UVA17	hom	II	11727116	A	G	coding_exon	F13D12.5	missense	D->G
UVA17	hom	II	11890190	T	C	intergenic
UVA17	hom	II	12067862	A	T	intergenic
UVA17	hom	II	12514185	A	T	coding_exon	srh-69	missense	F->I
UVA17	het	II	13206841	T	C	intron	btf-1
UVA17	het	II	14080015	A	C	coding_exon	xrn-1	synonymous	L->L
UVA17	het	II	14465748	A	T	intergenic
UVA17	het	II	14821311	A	T	intron	nhr-61
UVA17	het	III	498407	T	G	intron	unc-45
[truncated: 2,285 more rows]
